# Supplementary material for: The Set7 Lysine Methyltransferase Regulates Plasticity in Oxidative Phosphorylation Necessary for Trained Immunity Induced by β-Glucan
Source: PubMed Central journal article supplement — Cell Rep. 2020 Apr 21;31(3):107548. doi: 10.1016/j.celrep.2020.107548 (PMC7184679; doi:10.1016/j.celrep.2020.107548), 2020-04-21
Supplement: mmc1.pdf [file mmc1.pdf]

**Supplemental Information**

**The Set7 Lysine Methyltransferase Regulates  
Plasticity in Oxidative Phosphorylation Necessary  
for Trained Immunity Induced by  $\beta$ -Glucan**

**Samuel T. Keating, Laszlo Groh, Charlotte D.C.C. van der Heijden, Hanah Rodriguez, Jéssica C. dos Santos, Stephanie Fanucchi, Jun Okabe, Harikrishnan Kaipananickal, Jelmer H. van Puffelen, Leonie Helder, Marlies P. Noz, Vasiliki Matzaraki, Yang Li, L. Charlotte J. de Bree, Valerie A.C.M. Koeken, Simone J.C.F.M. Moorlag, Vera P. Mourits, Jorge Domínguez-Andrés, Marije Oosting, Elianne P. Bulthuis, Werner J.H. Koopman, Musa Mhlanga, Assam El-Osta, Leo A.B. Joosten, Mihai G. Netea, and Niels P. Riksen**

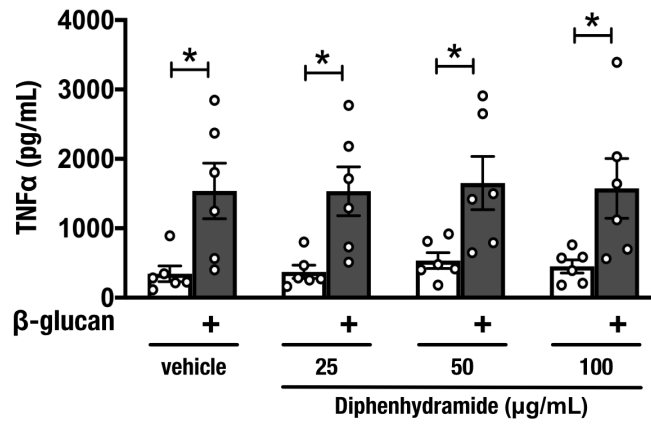

**Figure S1. Diphenhydramide does not inhibit trained immunity induced by β-glucan, Related to Figure 2.**

Production of TNFα by β-glucan-trained macrophages incubated with diphenhydramide for the first 24 hours of *in vitro* training and restimulated with LPS (n=6 healthy volunteers).

Data are represented as mean ± SEM, \*p < 0.05; Wilcoxon signed-rank test.

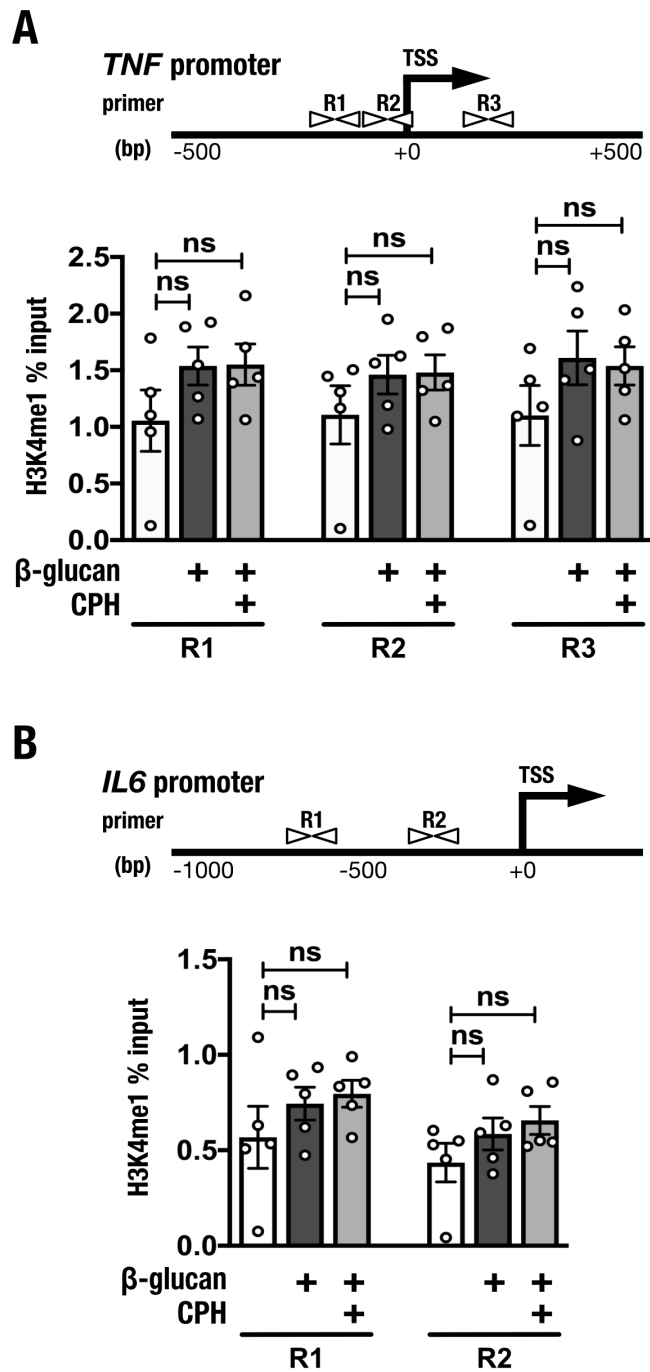

**Figure S2.  $\beta$ -glucan and CPH do not influence H3K4me1 enrichment at the promoters of *TNF* and *IL6*, Related to Figure 2 and Table S1.**

H3K4me1 enrichment at the gene promoters of (A) *TNF* and (B) *IL6* (n=5 healthy volunteers). The positions of primers relative to the transcription start site (TSS) are indicated.

Data are represented as mean  $\pm$  SEM, Wilcoxon signed-rank test.

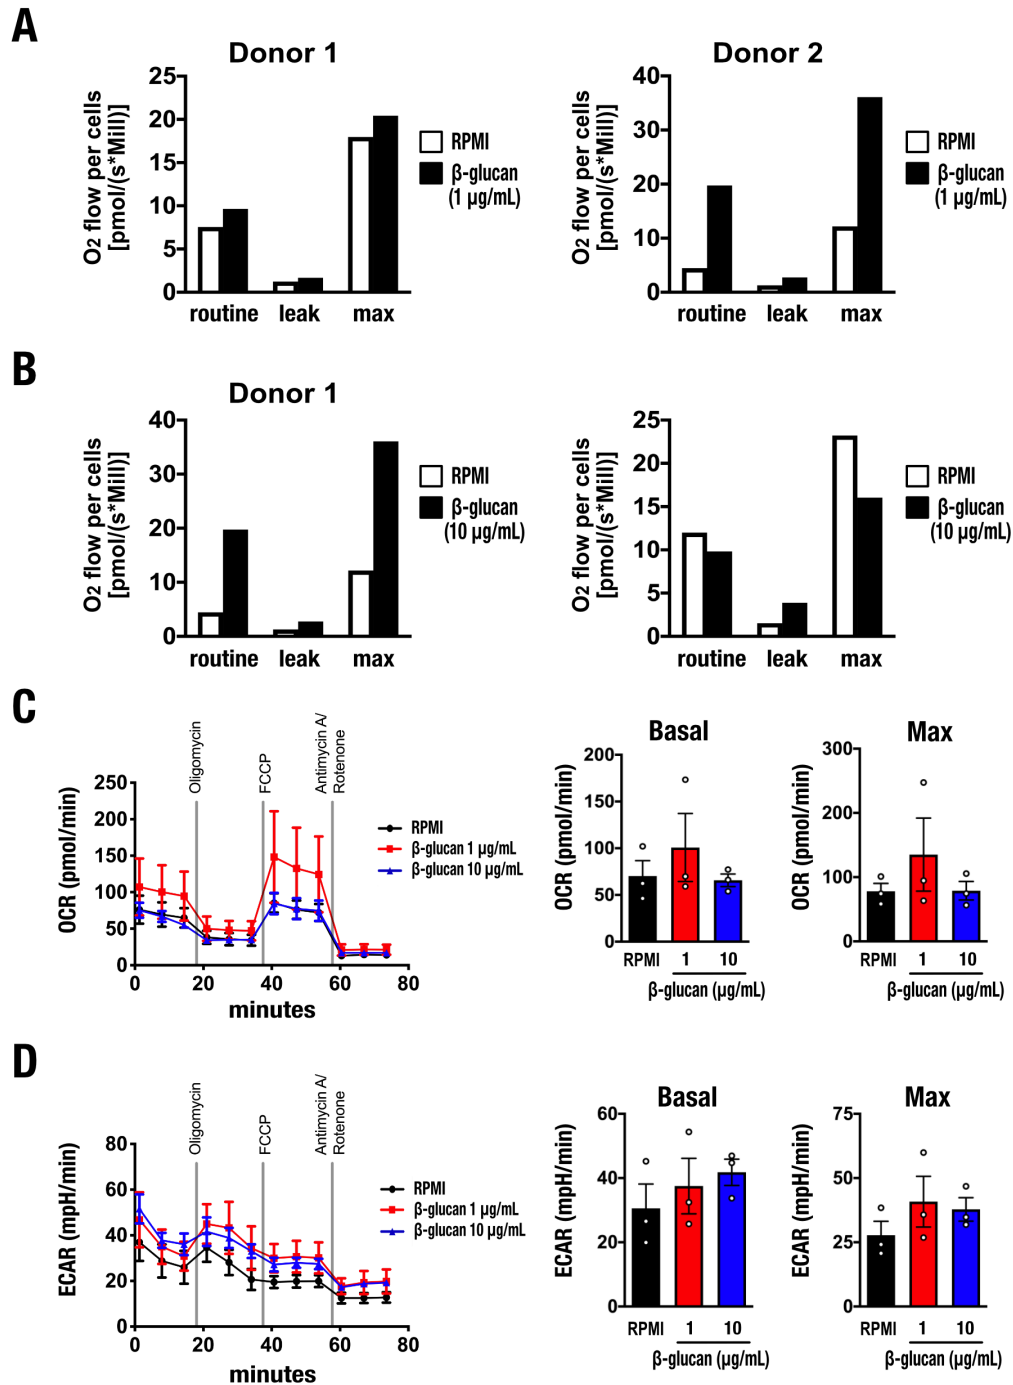

**Figure S3. Metabolic analysis of cells trained with different concentrations of  $\beta$ -glucan, Related to Figure 4.**

**A)** Respirometry measurements of macrophages from 2 health volunteers 5 days after incubation with 1  $\mu\text{g/mL}$  of  $\beta$ -glucan using the Oxygraph-2k. **(B)** Respirometry measurements of macrophages from 2 health volunteers 5 days after incubation with 10  $\mu\text{g/mL}$  of  $\beta$ -glucan using the Oxygraph-2k. **(C)** Oxygen consumption analysis (Seahorse system) of macrophages 5 days after incubation with 1  $\mu\text{g/mL}$  of  $\beta$ -glucan or 10  $\mu\text{g/mL}$  of  $\beta$ -glucan. Basal and maximum oxygen consumption rates (OCR) are indicated ( $n = 3$  healthy volunteers). **(D)** Extracellular acidification rate (ECAR) analysis (Seahorse system) of macrophages 5 days after incubation with 1  $\mu\text{g/mL}$  of  $\beta$ -glucan or 10  $\mu\text{g/mL}$  of  $\beta$ -glucan. Basal and maximum ECAR are indicated ( $n = 3$  healthy volunteers).

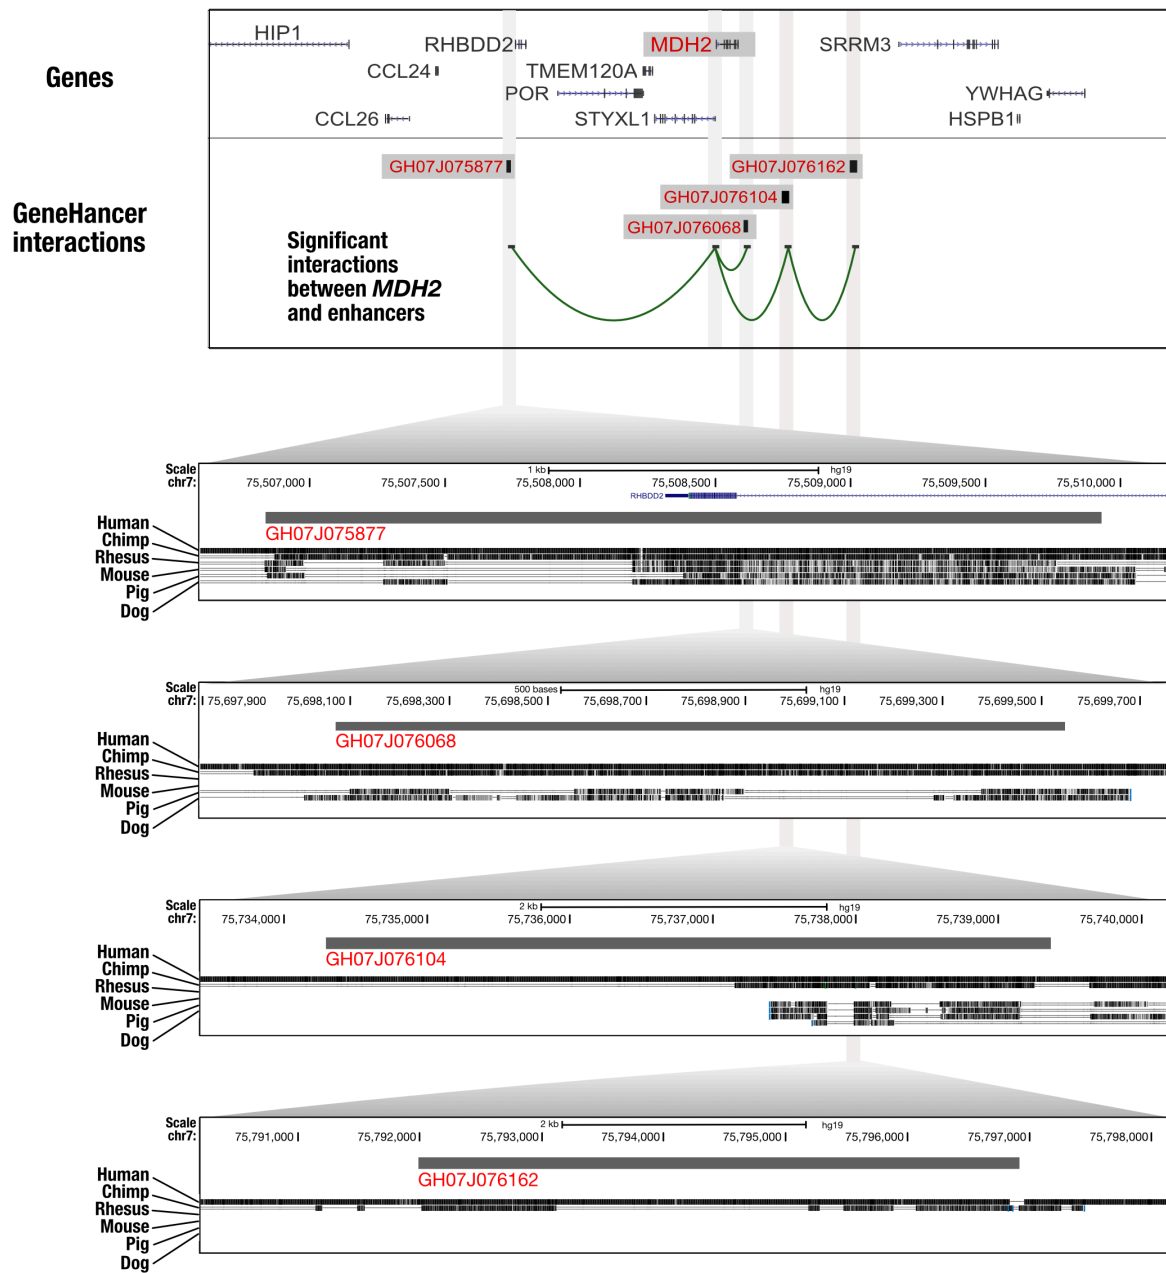

**Figure S4. Evolutionary conservation of distal enhancers associated with MDH2 gene regulation in humans, Related to Figure 6.** Alignment of genomic sequences from human, chimp, rhesus, mouse, pig and dog at GH07J075877, GH07J076068, GH07J076104 and GH07J076162

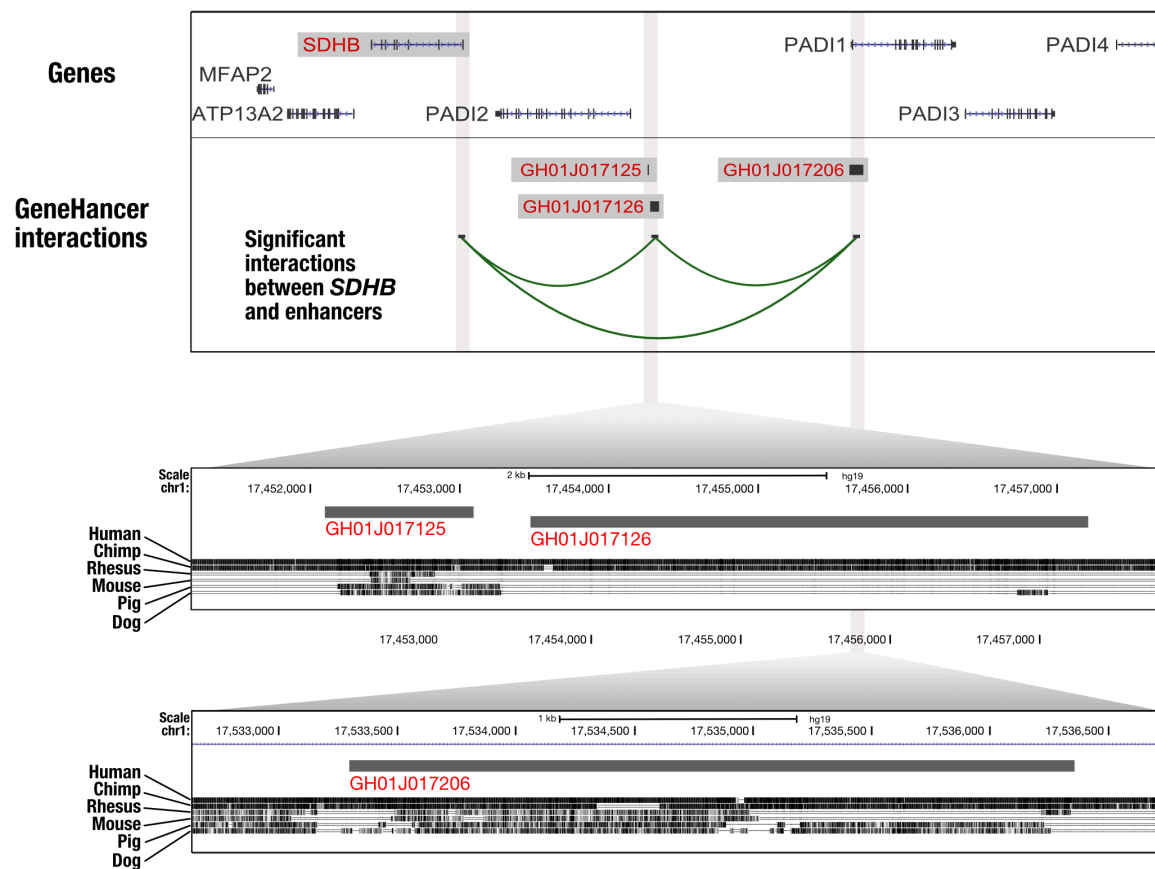

**Figure S5. Evolutionary conservation of distal enhancers associated with *SDHB* gene regulation in humans, Related to Figure 6.** Alignment of genomic sequences from human, chimp, rhesus, mouse, pig and dog at GH01J017125, GH01J017126 and GH01J017206.

**A**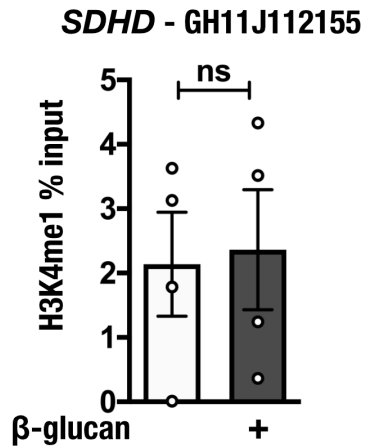**B**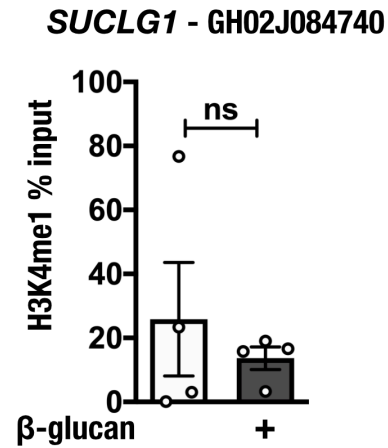

**Figure S6.  $\beta$ -glucan did not induce significant changes to H3K4me1 at distal enhancers associated with *SDHD* and *SUCLG1* gene regulation, Related to Figure 6 and Table S1.** (A) Levels of H3K4me1 at the GH11J112155 enhancer, associated with transcriptional regulation of *SDHD*, measured in primary human macrophages 5 days after incubation with  $\beta$ -glucan (n = 4 healthy volunteers). (B) Levels of H3K4me1 at the GH02J084740 enhancer, associated with transcriptional regulation of *SUCLG1*, measured in primary human macrophages 5 days after incubation with  $\beta$ -glucan (n = 4 healthy volunteers).

Data are represented as mean  $\pm$  SEM, Wilcoxon signed-rank test.

**Table S1. Primers used for qRT-PCR analysis of mRNA expression and immunoprecipitated chromatin.** Related to STAR Methods, *Quantitative RT-PCR* and *Chromatin immunoprecipitation*.

| <b>qRT-PCR primers for gene expression analysis</b>                 |                        |                           |
|---------------------------------------------------------------------|------------------------|---------------------------|
| <b>Human</b>                                                        |                        |                           |
| <b>Gene</b>                                                         | <b>Forward (5'→3')</b> | <b>Reverse (5'→3')</b>    |
| <i>SETD7</i>                                                        | AGTGTAAGCTCCCTGGCCCT   | G TTCACGGAGAAAAGAACGG     |
| <i>RPL29</i>                                                        | CACACAACCAGTCCCGAAAA   | TTGTGCTTCTTGGCAAAGCG      |
| <i>SUCLG1</i>                                                       | TATGGCACCAAACCTCGTTGGA | GAAGCCGTTGCTCCTGTCT       |
| <i>FH</i>                                                           | GGAGGTGTGACAGAACGCAT   | CATCTGCTGCCTTCATTATTGC    |
| <i>MDH2</i>                                                         | TCGGCCCAGAACAATGCTAAA  | GCGGCTTTGGTCTCGATGT       |
| <i>CS</i>                                                           | GGTGGCATGAGAGGCATGAA   | TAGCCTTGGGTAGCAGTTTCT     |
| <i>SDHA</i>                                                         | CAGCATGTGTTACCAAGCT    | GGTGTCTAGAAATGCCAC        |
| <i>SDHB</i>                                                         | ACAGCTCCCCGTATCAAGAAA  | GCATGATCTTCGGAAGGTCAA     |
| <i>SDHC</i>                                                         | AGAAACTGGACGGGCTCTAC   | TGTGGCAGCGGTATAGAGAG      |
| <i>SDHD</i>                                                         | CATCTCTCCACTGGACTAGCG  | TCCATCGCAGAGCAAGGATTC     |
| <i>18s</i>                                                          | GATGGGCGGCGGAAAATAG    | GCGTGGATTCTGCATAATGGT     |
| <b>Mouse</b>                                                        |                        |                           |
| <b>Gene</b>                                                         | <b>Forward (5'→3')</b> | <b>Reverse (5'→3')</b>    |
| <i>Setd7</i>                                                        | CGCTCAGCCACCAGGAGCAC   | G TCCAGGTGCCCTTCCACGG     |
| <i>Csf2</i>                                                         | ATGCCTGTCACGTTGAATGA   | TGGTGAAATTGCCCCGTAGA      |
| <i>Ii1b</i>                                                         | ACGGACCCCAAAGATGAAGGG  | ACTGCCTGCCTGAAGCTCTTGT    |
| <i>Cd34</i>                                                         | ACATCACCCACCGAGCCATA   | AAACTCCTCACAACCTAGATGCTTC |
| <i>Mdh2</i>                                                         | TACCTTGGACCGGAGCAGTT   | TCATCCCCTGTCATTCTCTGG     |
| <i>Sdhb</i>                                                         | AGAGAAGGCATCTGTGGCTC   | AGACTTTGCTGAGGTCCGTG      |
| <i>Fh1</i>                                                          | AAGCCAGAGCTCGAATGACA   | TGTAACCCTGGCAACAGGAC      |
| <i>Suclg2</i>                                                       | GGTCTTACACAGCCTCTCGG   | AGGTACCCTGTTTGCCTGTG      |
| <i>H3f3a</i>                                                        | GAGCTCCAGCCGAAGGAGAAG  | CAGTACCAGGCCTGTAACGATGAG  |
| <b>qRT-PCR primers for analysis of immunoprecipitated chromatin</b> |                        |                           |
| <b>Region</b>                                                       | <b>Forward (5'→3')</b> | <b>Reverse (5'→3')</b>    |
| <i>TNF</i> promoter R1                                              | CAGGCAGGTTCTCTTCCTCT   | GCTTTCAGTGCTCATGGTGT      |
| <i>TNF</i> promoter R2                                              | AGAGGACCAGCTAAGAGGGA   | AGCTTGTCAGGGGATGTGG       |
| <i>TNF</i> promoter R3                                              | GTGCTTGTTCTCAGCCTCT    | ATCACTCCAAAGTGCAGCAG      |



|                        |                        |                         |
|------------------------|------------------------|-------------------------|
| <i>IL6</i> promoter R1 | TCGTGCATGACTTCAGCTTT   | GCGCTAAGAAGCAGAACCAC    |
| <i>IL6</i> promoter R2 | AGGGAGAGCCAGAACACAGA   | GAGTTTCCTCTGACTCCATCG   |
| GH07J075877 R1         | AAGATAAAGCTGCCCTGGC    | GAGGGCCCTGGGTAATTCAG    |
| GH07J075877 R2         | TCTTGCTCTCCGTGTTCCAC   | CTTGGAGAGCGAGCATGGAT    |
| GH07J075877 R3         | GGCCTAAGCCCCACTGAAAA   | TCCAAAGGCAGAAGACACCC    |
| GH07J075877 R4         | ATGAAGCCTCTGGTGATGGC   | GAACCCAGAAAGTGGGAGG     |
| GH07J076068 R1         | AGGACCTGGGACTCAAGCTA   | GGGTAGCCCCTGGTTTATGG    |
| GH07J076104 R1         | CAGGGGTGCGCATTTCAG     | TCTGTCCAGAACCCAGTGA     |
| GH07J076104 R2         | GCTCACTGGGGTTCTGGACA   | AGTGCCTCCAGAAAGGGTTG    |
| GH07J076162 R1         | ACCAAGTTGGAACCCCTAGC   | GGGATAGGCCCGTCCTGTAT    |
| GH07J076162 R2         | CGCCCCTTCTGTAGAACCAA   | GCAGTGGTAAAGCTCGTCCT    |
| GH01J017206 R1         | AGACGAGGACAGCTCAGACT   | GAGGGCCCTGGGTAATTCAG    |
| GH01J017206 R2         | GAGGTTGCTCTGGGATCCTG   | CCAACACCCAGGTGAAGGTT    |
| GH01J017206 R3         | GGGAAAGAGGGGCATGGAAT   | GTGTAACCCCTTCCTCCTGC    |
| GH01J017206 R4         | CCTGATTCCCTGGATCTGGC   | CACAGGACCGCAGATGGATT    |
| GH01J017206 R5         | AATCCATCTGCGGTCCTGTG   | TGCATTGCTGCTTTTGCAGT    |
| GH01J017126 R1         | GGTTCCATTGACAATCTTGGCT | TCAAGGCTGAAGTGTGTCGG    |
| GH01J017126 R2         | AGACTCTGACGCTCCTGGTTA  | GTGCTTGAGAAAGTTGTGTTTGT |
| GH01J017125 R1         | CCATCTTGGAAGCAGGGAGG   | GCCCCTGAATTCTGACCCAA    |
| GH01J017125 R2         | TTGGGTCAGAATTCAGGGGC   | CCCTTTGTCCAGCGAGAAGT    |
| GH01J017125 R3         | GGGAACTTCTCGCTGGACAA   | GAATCAACGACCCAGGCTCA    |
| GH01J017125 R4         | ATCCTAGCCCTTCCTGGCTT   | GGTGCCATGATTAACCCCA     |
| GH11J112174 R1         | TCCGCATTAAAGCACCCGAT   | CCCCGGGTGTGTCAATAAGT    |
| GH02J084740 R1         | TGACCCATGCAGACCAGTTC   | GACTGGAGTGGGAGGAGAGT    |
