# Supplementary material for: The Set7 Lysine Methyltransferase Regulates Plasticity in Oxidative Phosphorylation Necessary for Trained Immunity Induced by β-Glucan
Source: PubMed Central journal article supplement — Cell Rep. 2020 Apr 21;31(3):107548. doi: 10.1016/j.celrep.2020.107548 (PMC7184679; doi:10.1016/j.celrep.2020.107548), 2020-04-21
Supplement: mmc2.pdf [file mmc2.pdf]

# The Set7 Lysine Methyltransferase Regulates Plasticity in Oxidative Phosphorylation Necessary for Trained Immunity Induced by $\beta$ -Glucan

## Graphical Abstract

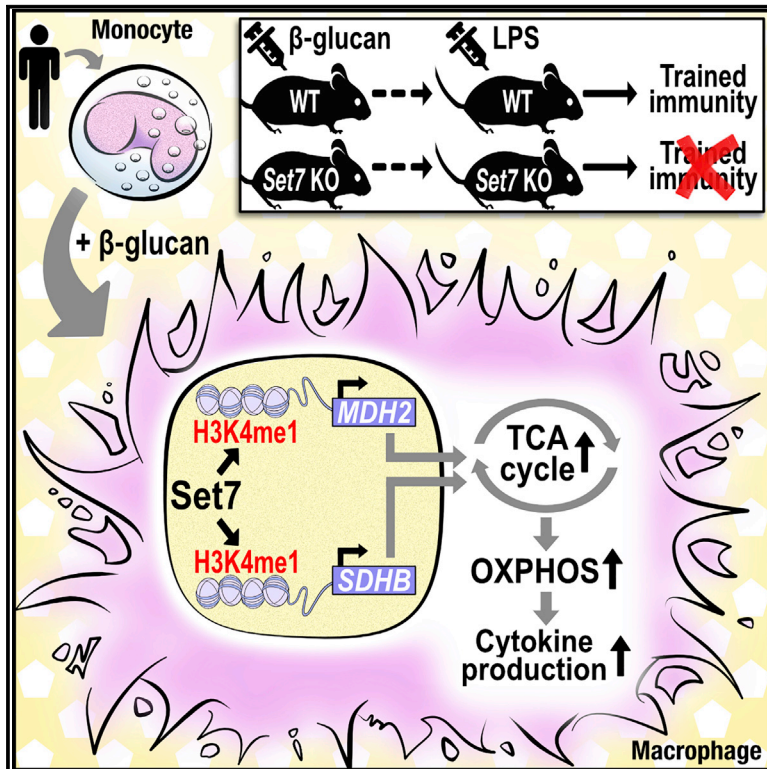

## Authors

Samuel T. Keating, Laszlo Groh, Charlotte D.C.C. van der Heijden, ..., Leo A.B. Joosten, Mihai G. Netea, Niels P. Riksen

## Correspondence

niels.riksen@radboudumc.nl

## In Brief

Using a combination of pharmacological and genetic approaches, Keating et al. show that the Set7 methyltransferase is a regulator of trained immunity induced by  $\beta$ -glucan. Activation of Set7 increases oxidative phosphorylation in trained cells via histone lysine methylation at gene enhancers of key enzymes of the TCA cycle.

## Highlights

- Set7 regulates enhanced cytokine production in trained immunity *in vitro*
- Set7 knockout mice are unable to mount trained immunity against endotoxin challenge
- Set7 modulates cellular respiration in  $\beta$ -glucan-trained macrophages
- Set7-dependent histone methylation regulates *MDH2* and *SDHB* in trained cells

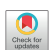

# The Set7 Lysine Methyltransferase Regulates Plasticity in Oxidative Phosphorylation Necessary for Trained Immunity Induced by $\beta$ -Glucan

Samuel T. Keating,<sup>1</sup> Laszlo Groh,<sup>1</sup> Charlotte D.C.C. van der Heijden,<sup>1</sup> Hanah Rodriguez,<sup>2</sup> Jéssica C. dos Santos,<sup>1</sup> Stephanie Fanucchi,<sup>3,4</sup> Jun Okabe,<sup>2</sup> Harikrishnan Kaipananickal,<sup>2,5</sup> Jelmer H. van Puffelen,<sup>1,6</sup> Leonie Helder,<sup>1</sup> Marlies P. Noz,<sup>1</sup> Vasiliki Matzaraki,<sup>1</sup> Yang Li,<sup>1,7</sup> L. Charlotte J. de Bree,<sup>1,8,9</sup> Valerie A.C.M. Koeken,<sup>1</sup> Simone J.C.F.M. Moorlag,<sup>1</sup> Vera P. Mourits,<sup>1</sup> Jorge Domínguez-Andrés,<sup>1</sup> Marije Oosting,<sup>1</sup> Elianne P. Bulthuis,<sup>10</sup> Werner J.H. Koopman,<sup>10</sup> Musa Mhlanga,<sup>3</sup> Assam El-Osta,<sup>2,5,11</sup> Leo A.B. Joosten,<sup>1,12</sup> Mihai G. Netea,<sup>1,13</sup> and Niels P. Riksen<sup>1,14,\*</sup>

<sup>1</sup>Department of Internal Medicine and Radboud Institute of Molecular Life Sciences (RIMLS), Radboud University Medical Center, Nijmegen, the Netherlands

<sup>2</sup>Epigenetics in Human Health and Disease, Department of Diabetes, Monash University, Melbourne, VIC, Australia

<sup>3</sup>Division of Chemical, Systems and Synthetic Biology, Department of Integrative Biomedical Sciences, Faculty of Health Sciences, Institute of Infectious Disease and Molecular Medicine, University of Cape Town, Cape Town, South Africa

<sup>4</sup>Gene Expression and Biophysics Group, CSIR Biosciences, Pretoria, South Africa

<sup>5</sup>Department of Clinical Pathology, The University of Melbourne, Melbourne, VIC, Australia

<sup>6</sup>Department for Health Evidence, Radboud University Medical Center, Nijmegen, the Netherlands

<sup>7</sup>Department of Computational Biology for Individualised Infection Medicine, Centre for Individualised Infection Medicine, Helmholtz Centre for Infection Research, Hannover Medical School, 30625 Hannover, Germany

<sup>8</sup>Research Center for Vitamins and Vaccines, Bandim Health Project, Statens Serum Institut, Copenhagen, Denmark

<sup>9</sup>Odense Patient Data Explorative Network, University of Southern Denmark/Odense University Hospital, Odense, Denmark

<sup>10</sup>Department of Biochemistry, Radboud Institute of Molecular Life Sciences (RIMLS), Radboud University Medical Center, Nijmegen, the Netherlands

<sup>11</sup>Prince of Wales Hospital, The Chinese University of Hong Kong, Hong Kong City, Hong Kong SAR

<sup>12</sup>Department of Medical Genetics, Iuliu Hatieganu University of Medicine and Pharmacy, Cluj-Napoca, Romania

<sup>13</sup>Department for Genomics and Immunoregulation, Life and Medical Sciences Institute (LIMES), University of Bonn, Bonn, Germany

<sup>14</sup>Lead Contact

\*Correspondence: [niels.riksen@radboudumc.nl](mailto:niels.riksen@radboudumc.nl)

<https://doi.org/10.1016/j.celrep.2020.107548>

## SUMMARY

Trained immunity confers a sustained augmented response of innate immune cells to a secondary challenge, via a process dependent on metabolic and transcriptional reprogramming. Because of its previous associations with metabolic and transcriptional memory, as well as the importance of H3 histone lysine 4 monomethylation (H3K4me1) to innate immune memory, we hypothesize that the Set7 methyltransferase has an important role in trained immunity induced by  $\beta$ -glucan. Using pharmacological studies of human primary monocytes, we identify trained immunity-specific immunometabolic pathways regulated by Set7, including a previously unreported H3K4me1-dependent plasticity in the induction of oxidative phosphorylation. Recapitulation of  $\beta$ -glucan training *in vivo* additionally identifies Set7-dependent changes in gene expression previously associated with the modulation of myelopoiesis progenitors in trained immunity. By revealing Set7 as a key regulator of trained immunity, these findings provide mechanistic insight into sustained meta-

bolic changes and underscore the importance of characterizing regulatory circuits of innate immune memory.

## INTRODUCTION

A series of recent discoveries has uncovered how cells of the innate immune system such as monocytes and macrophages undergo functional reprogramming to mount a *de facto* immune memory of an infectious or inflammatory injury by a process called trained immunity, which facilitates augmented responses to subsequent pathogenic encounters (Netea et al., 2020). In the context of infections or vaccination, trained immunity provides beneficial heterologous effects by the enhanced cytokine response to stimulation with non-related pathogens. Prototypical stimuli of trained immunity include the fungal cell wall component  $\beta$ -glucan (Quintin et al., 2012) and the bacillus Calmette-Guérin (BCG) vaccine (Kleinnijenhuis et al., 2012). Recent attention has also turned to endogenous drivers of inflammation as inducers of trained immunity (Bekkering et al., 2014; van der Valk et al., 2016). These stimuli shape innate immunological memories by reprogramming metabolic and transcriptional profiles (Arts et al., 2016a; Cheng et al., 2014).

Posttranslational methylation of proteins conveys information to cellular pathways, including those that regulate gene

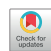

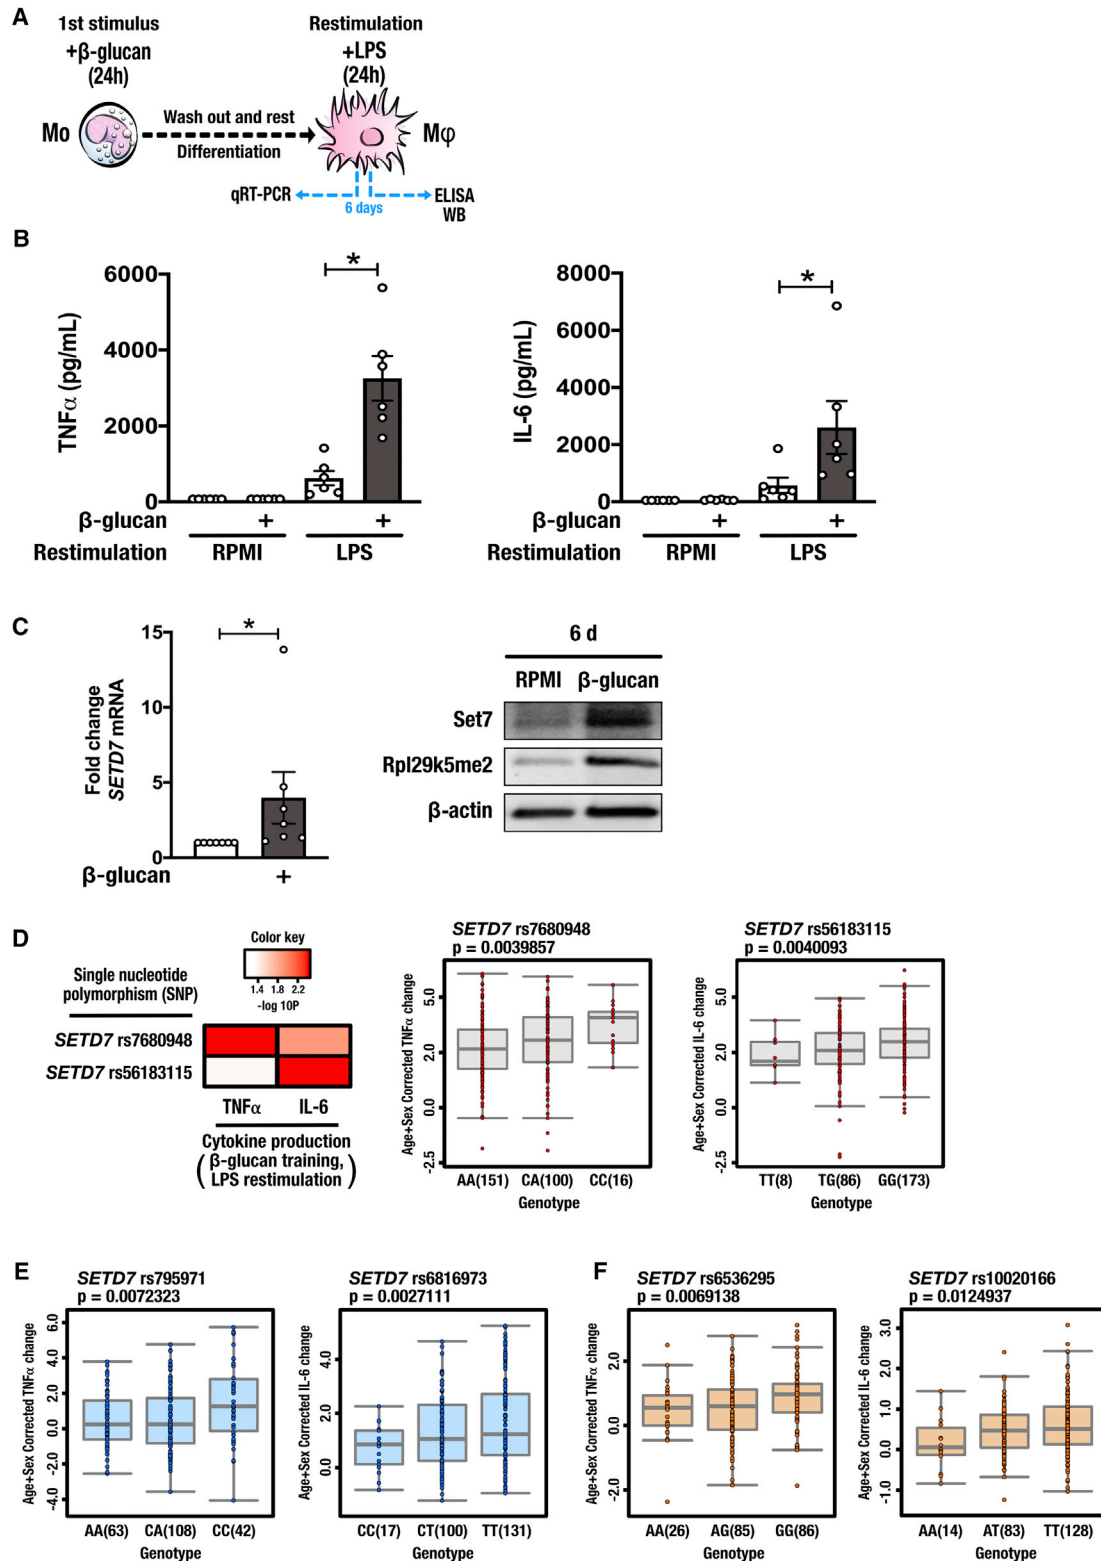

**Figure 1. Set7 Is Associated with Trained Immunity Induced by  $\beta$ -Glucan**

(A) Graphical outline of *in vitro* training methods. Adherent monocytes (Mo) were stimulated with 1  $\mu$ g/mL  $\beta$ -glucan or standard culture medium (RPMI) for 24 h (first stimulus), allowed to differentiate to macrophages (M $\phi$ ) for 5 days, and restimulated for 24 h with LPS or RPMI on day 6.

(legend continued on next page)

expression. *In vitro* experiments with pan-methyltransferase inhibitors revealed the pivotal importance of this chemical modification for trained macrophages (Cheng et al., 2014; Quintin et al., 2012). Changes in histone lysine methyl modifications (H3 histones monomethylated [H3K4me1] or trimethylated [H3K4me3] at lysine 4) underlie  $\beta$ -glucan-induced trained immunity (Novakovic et al., 2016). Signaling factors derived from local tissue environments play key roles in determining macrophage fate, and evidence points to the role of enhancer elements in shaping specialized macrophage populations (Denisenko et al., 2017; Gosselin et al., 2014). H3K4me1 is a chromatin signature of enhancers (Heintzman et al., 2007). This modification was shown to persist at decommissioned distal elements, indicating that H3K4me1 provides a mechanism for epigenetic memory in trained immunity in macrophages (Saeed et al., 2014). Despite this, the mechanisms linking immunological signals induced by microbial stimuli or vaccines to chromatin-dependent changes in trained immunity are unclear. Moreover, the identities of the chromatin-modifying enzymes critical to these processes remain obscure.

One enzyme that writes the H3K4me1 modification to transcriptionally activating or poised genomic regions is the Set7 lysine methyltransferase (Wang et al., 2001) (also called Set9 [Nishioka et al., 2002], Set7/9 [Tamura et al., 2018], or KMT7 [Allis et al., 2007], and encoded by *SETD7*). Set7 writes a persistent H3K4me1 signature pertaining to vascular endothelial inflammatory signaling (Brasacchio et al., 2009). The importance of Set7 for mediating H3K4me1 signatures at enhancers associated with endothelial gene expression was demonstrated using an unbiased epigenome-wide approach (Keating et al., 2014). Although Set7 has not been studied in the specific context of trained immunity, our previous analysis of macrophages trained with  $\beta$ -glucan identified elevated levels of *SETD7* expression (Quintin et al., 2012).

The current study explored the role of Set7 in  $\beta$ -glucan-induced trained immunity. Using genetic and pharmacological approaches, we demonstrate that Set7 is critical for the induction of trained immunity *in vitro* and *in vivo*. We identify a role for Set7 in immunometabolic pathways, including the induction of oxidative phosphorylation (OXPHOS). Characterization of epigenetic networks is key to a deeper understanding of regulatory mechanisms supporting trained immunity, and could identify strategies to modulate pro-inflammatory circuits of the innate immune system.

## RESULTS

### Set7 Expression and Activity Are Increased in Human Primary Monocytes and Macrophages Stimulated with $\beta$ -Glucan

To investigate the role of Set7, we adopted a previously described *in vitro* model of trained immunity using the fungal cell wall component  $\beta$ -glucan (Cheng et al., 2014). Adherent human primary monocytes were incubated with culture medium or  $\beta$ -glucan (1  $\mu$ g/mL) for 24 h. Cells were washed and incubated in normal culture conditions for a further 5 days, during which time they differentiated into macrophages. On day 6, the cells were restimulated with the Toll-like receptor 4 ligand lipopolysaccharide (LPS) (10 ng/mL) for 24 h and pro-inflammatory cytokine production was measured (Figure 1A). Tumor necrosis factor alpha (TNF $\alpha$ ) and IL-6 were measured as functional readouts of trained immunity (Arts et al., 2016a; Cheng et al., 2014). Cells stimulated with  $\beta$ -glucan exhibited enhanced TNF $\alpha$  and IL-6 production following LPS restimulation (Figure 1B). We validated our previous transcriptome data showing that *SETD7* mRNA expression was significantly increased on day 6 of the *in vitro* training protocol in macrophages trained with  $\beta$ -glucan. Currently, there is no gold standard test for Set7 activity in primary cells. However, a recent study identified the ribosomal protein Rpl29, a component of the 60S ribosomal subunit, as a non-histone methylation substrate of Set7 (Hamidi et al., 2018), and dimethylated Rpl29 (Rpl29k5me2) was shown to serve as a reliable biomarker for Set7 activity in cancer cells. We observed that Rpl29k5me2 levels correlated with Set7 protein expression in macrophages trained with  $\beta$ -glucan (Figure 1C).

To further investigate the association of Set7 to trained immunity, we conducted a genetic study of peripheral blood mononuclear cells (PBMCs) isolated from 267 healthy volunteers of Western European ancestry. Adherent PBMCs from all volunteers were incubated with trained with culture medium or  $\beta$ -glucan (1  $\mu$ g/mL) for 24 h as described above. We tested for associations among common single-nucleotide polymorphisms (SNPs) and variation in the magnitude of  $\beta$ -glucan-trained cytokine responses of individual subjects and identified two SNPs suggestively associated ( $p < 9.99 \times 10^{-3}$ ) with adaptive changes in cytokine production mapped within *SETD7*. Intronic variants rs7680948 (located in intron 4 of *SETD7* [ $p < 0.004$ ]) and rs56183115 (located in intron 3 of *SETD7* [ $p = 0.004$ ]) were associated with the potentiation of TNF $\alpha$  and IL-6 production, respectively, upon induction of trained immunity by  $\beta$ -glucan (Figure 1D). To investigate Set7 in trained immunity induced by

(B) Production of pro-inflammatory cytokines TNF $\alpha$  and IL-6 by trained macrophages following restimulation ( $n = 6$  healthy volunteers per group).

(C) Expression of *SETD7* mRNA prior to restimulation (6 d) ( $n = 7$  healthy volunteers per group). Representative western blot analysis of differentiated macrophages performed on day 6, prior to restimulation. Set7 encoded by the *SETD7* gene; Rpl29k5me2 as a marker for Set7 activity;  $\beta$ -actin was used as loading control.

(D) Single-nucleotide polymorphisms (SNPs) within *SETD7* suggestively associated with trained responses to  $\beta$ -glucan in peripheral blood mononuclear cells ( $n = 267$ ). Age- and sex-corrected TNF $\alpha$  and IL-6 changes are shown as boxplots for rs7680948 and rs56183115, respectively.

(E) SNPs near *SETD7* suggestively associated with trained responses to the bacillus Calmette-Guérin vaccine in peripheral blood mononuclear cells. Age- and sex-corrected TNF $\alpha$  and IL-6 changes are shown as boxplots for rs795971 ( $n = 213$ ) and rs6816973 ( $n = 248$ ), respectively.

(F) SNPs near *SETD7* suggestively associated with trained responses to the oxidized low-density lipoprotein in peripheral blood mononuclear cells. Age- and sex-corrected TNF $\alpha$  and IL-6 changes are shown as boxplots for rs6536295 ( $n = 197$ ) and rs10020166 ( $n = 225$ ), respectively.

Data are represented as mean  $\pm$  SEM. \* $p < 0.05$ , Wilcoxon signed-rank test.

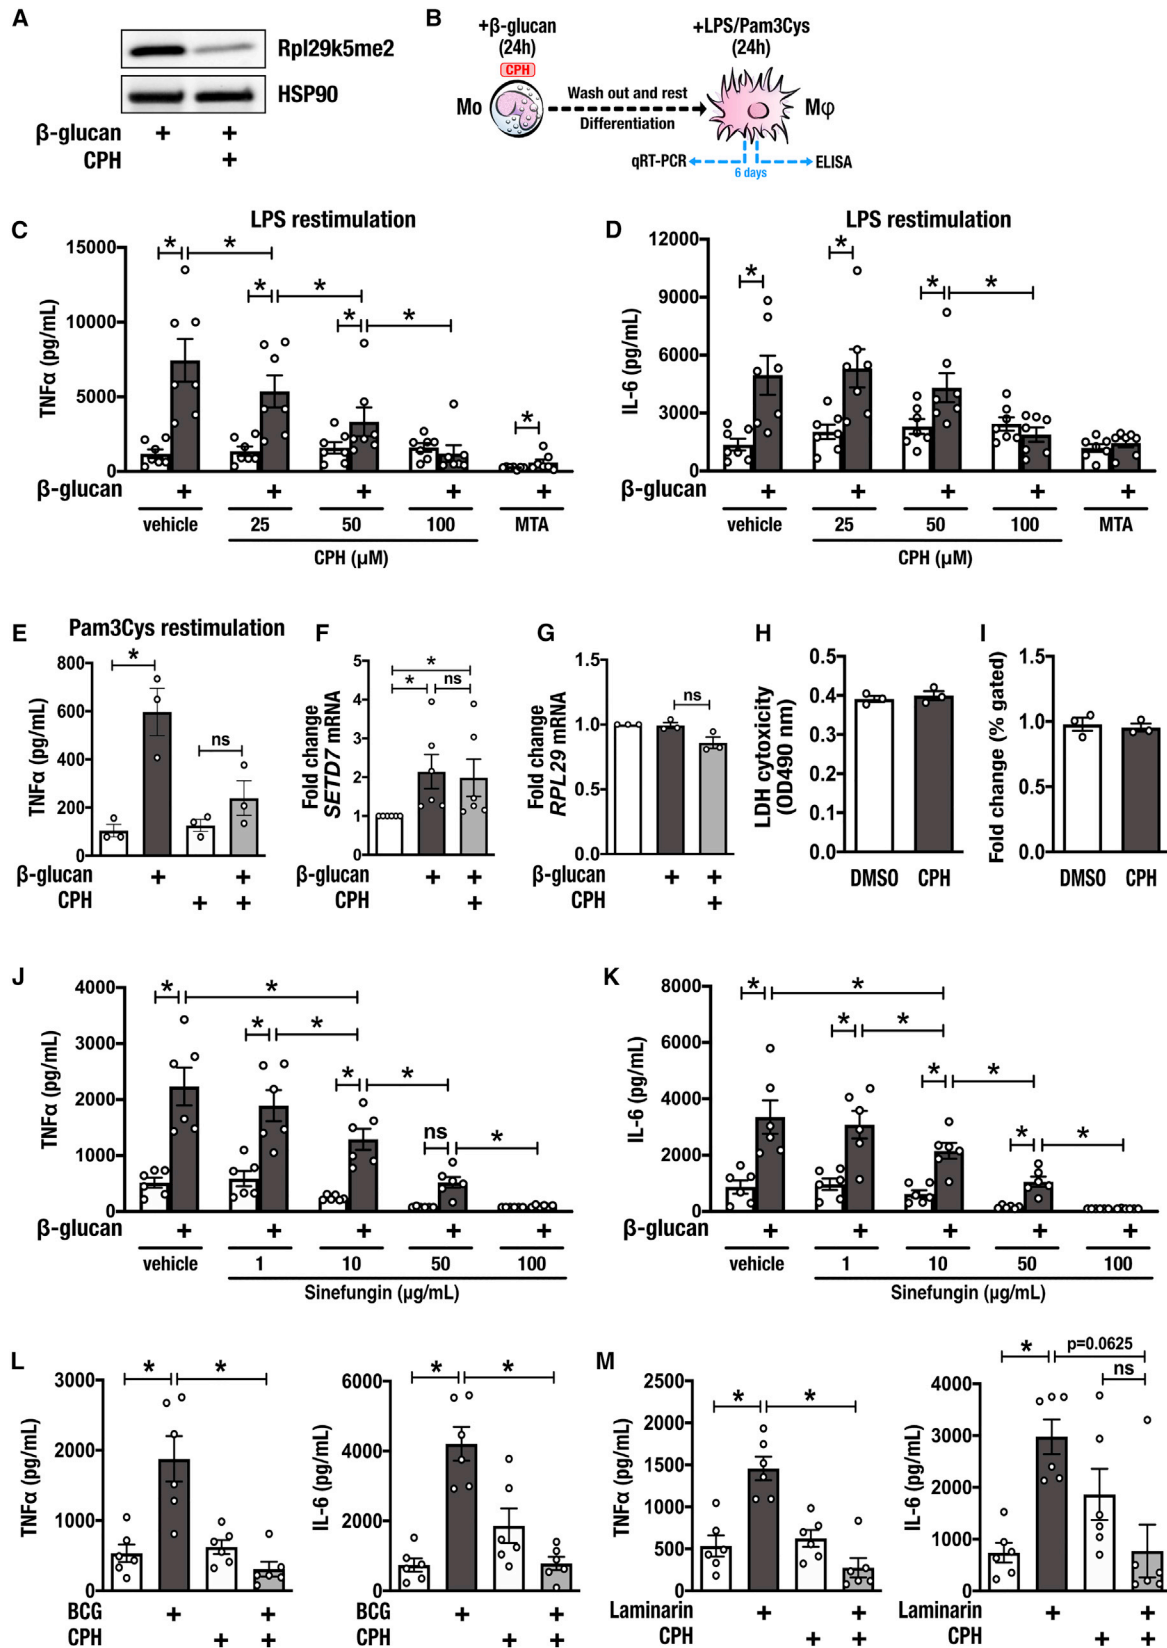

(legend on next page)

other stimuli, we tested for associations among SNPs near *SETD7* and variation in the magnitude of cytokine responses of individuals trained with BCG and oxidized low-density lipoprotein (oxLDL). We identified numerous SNPs suggestively associated ( $p < 9.99 \times 10^{-3}$ ) with adaptive changes in pro-inflammatory cytokine production mapped within 250 kb of *SETD7*. Variants rs795971 (located approximately 250 kb upstream of *SETD7* [ $p = 0.007$ ]) and rs6816973 (located approximately 160 kb upstream of *SETD7* [ $p < 0.003$ ]) were associated with the potentiation of TNF $\alpha$  and IL-6 production, respectively, upon induction of trained immunity by BCG (Figure 1E). In addition, we identified that variants rs6536295 (located approximately 3 kb upstream of *SETD7* [ $p < 0.007$ ]) and rs10020166 (located approximately 15 kb upstream of *SETD7* [ $p = 0.01$ ]) were associated with the production of TNF $\alpha$  and IL-6, respectively, upon induction of trained immunity by oxLDL (Figure 1F).

### Pharmacological Inhibition of Set7 Attenuates $\beta$ -Glucan-Induced Trained Immunity *In Vitro*

Recent studies demonstrated specific inhibition of Set7 activity by cyproheptadine (CPH) in human breast cancer cells (Takemoto et al., 2016). To test whether CPH similarly inhibits Set7 in primary cells, we measured Rpl29K5me2 levels of macrophages trained with  $\beta$ -glucan and observed a strong reduction of this posttranslational modification following 24-h incubation with 100  $\mu$ M CPH (Figure 2A). To characterize the effects of CPH on trained immunity, we conducted *in vitro* training experiments on monocytes exposed to a range of CPH concentrations (Figure 2B). When co-incubated with  $\beta$ -glucan for only the first 24 h of the training protocol, CPH dose-dependently attenuated the heightened responsiveness of trained cells to restimulation with LPS (Figures 2C and 2D). This effect was most pronounced at the highest concentration of CPH tested (100  $\mu$ M); however, a significant reduction in TNF $\alpha$  production was observed after co-incubation with 25  $\mu$ M CPH.

Similar inhibition of  $\beta$ -glucan-induced trained immunity by CPH (100  $\mu$ M) was observed when the cells were restimulated with the Toll-like receptor 2 agonist Pam3Cys (10  $\mu$ g/mL) (Figure 2E). Exposure to this concentration of CPH did not alter the mRNA expression of *SETD7* (measured on day 6, prior to restimulation), indicating that the inhibitory effect on trained immunity occurred at the level of Set7 activity (Figure 2F, open bar represents DMSO vehicle controls). Similarly, *RPL29* mRNA expression was unaffected by 100  $\mu$ M CPH (Figure 2G, open bar represents DMSO vehicle controls). The attenuating effect of CPH on cytokine production was not due to cytotoxicity of the compound (Figure 2H) or induction of apoptosis (Figure 2I). We excluded the possibility that CPH inhibits trained immunity via its antihistamine properties by performing experiments using an alternative antihistamine inhibitor, diphenhydramide, which did not alter trained immunity induced by  $\beta$ -glucan (Figure S1).

To validate the observation of Set7-dependent regulation of cytokine production, we also tested the Set7 inhibitor sinefungin (Sasaki et al., 2016). Sinefungin dose-dependently inhibited the heightened production of TNF $\alpha$  and IL-6 by trained cells following restimulation with LPS (Figures 2J and 2K). To test the broader role of Set7 as a key regulator of trained immunity, we assessed the effects of CPH on trained cytokine production by other compounds previously shown to induce trained immunity. Indeed, incubation with 100  $\mu$ M CPH also inhibited the induction of trained immunity by BCG (Figure 2L). Similarly, the dectin-1 ligand laminarin was previously demonstrated to induce trained immunity (Petit et al., 2019). Here, we show that the augmented TNF $\alpha$  production exhibited by macrophages trained with laminarin was inhibited by CPH. A similar trend was observed for IL-6 production, with no difference observed between cells that were incubated with laminarin and CPH, or laminarin alone (Figure 2M).

To understand the mechanism of Set7-dependent cytokine production in trained immunity, we assessed the *TNF* and *IL6*

### Figure 2. Pharmacological Inhibition of Set7 Dose-Dependently Attenuates the Pro-inflammatory Cytokine Response of Trained Immunity *In Vitro*

- (A) Western blot analysis of  $\beta$ -glucan-trained macrophages incubated with cyproheptadine (CPH) for 24 h. HSP90 was used as a loading control.  
 (B) Graphical overview of *in vitro* training methods. Adherent monocytes (Mo) were stimulated with  $\beta$ -glucan or RPMI culture medium for 24 h in the presence of CPH or DMSO vehicle control, allowed to differentiate to macrophages (M $\phi$ ), and restimulated for 24 h with LPS, Pam3Cys, or RPMI on day 6.  
 (C and D) Production of (C) TNF $\alpha$  and (D) IL-6 by  $\beta$ -glucan-trained macrophages incubated with CPH or 5'-methylthioadenosine (MTA) for the first 24 h of *in vitro* training and restimulated with LPS (n = 7 healthy volunteers).  
 (E) Production of TNF $\alpha$  by  $\beta$ -glucan-trained macrophages incubated with CPH for the first 24 h of *in vitro* training and restimulated with Pam3Cys (n = 3 healthy volunteers).  
 (F) Expression of *SETD7* mRNA on day 6 by cells trained with  $\beta$ -glucan in the presence of 100  $\mu$ M CPH (n = 6 healthy volunteers; open bar represents DMSO vehicle control).  
 (G) Expression of *RPL29* mRNA at 24 h by cells trained with  $\beta$ -glucan in the presence of 100  $\mu$ M CPH (n = 3 healthy volunteers; open bar represents DMSO vehicle control).  
 (H) Analysis of lactate dehydrogenase (LDH) as a measure of cytotoxicity in cells incubated with 100  $\mu$ M CPH for 24 h (n = 3 healthy volunteers).  
 (I) Analysis of viability and apoptosis with Annexin V and PI staining in cells incubated with 100  $\mu$ M CPH versus DMSO vehicle controls for 24 h (n = 3 healthy volunteers). Fold change difference between CPH and vehicle controls.  
 (J and K) Production of (J) TNF $\alpha$  and (K) IL-6 by  $\beta$ -glucan-trained macrophages incubated with sinefungin for the first 24 h of *in vitro* training and restimulated with LPS (n = 6 healthy volunteers).  
 (L) Production of TNF $\alpha$  and IL-6 by bacillus Calmette-Guérin (BCG)-trained macrophages incubated with 100  $\mu$ M CPH for the first 24 h of *in vitro* training and restimulated with LPS (n = 6 healthy volunteers).  
 (M) Production of TNF $\alpha$  and IL-6 by laminarin-trained macrophages incubated with 100  $\mu$ M CPH for the first 24 h of *in vitro* training and restimulated with LPS (n = 6 healthy volunteers).

Data are represented as mean  $\pm$  SEM. \* $p < 0.05$ , Wilcoxon signed-rank test or t test where appropriate.

See also Figures S1 and S2.

promoters by chromatin immunoprecipitation (ChIP) on day 6. We did not observe significant increases in H3K4me1 enrichment at either promoter in cells trained with  $\beta$ -glucan. A similar pattern of H3K4me1 enrichment was observed for cells trained in the presence of 100  $\mu$ M CPH (Figure S2), suggesting that Set7 does not directly regulate *TNF* and *IL6* expression via promoter histone methylation.

Together, these findings identify an important role for Set7 in trained immunity *in vitro*.

### Set7 Regulates Trained Immunity *In Vivo*

Using murine models, we and others (Cheng et al., 2014; Garcia-Valtanen et al., 2017) have described the specific contribution of  $\beta$ -glucan to the activation of trained immunity *in vivo*. Wild-type mice that received  $\beta$ -glucan injections exhibited enhanced cytokine production by innate immune cells in response to a secondary challenge or infection (Arts et al., 2016a). We adopted a similar approach to test the role of Set7 in trained immunity *in vivo*. We generated a Set7 constitutive knockout (*Setd7* KO) mouse model by the deletion of *Setd7* exon 2 region (unpublished data). Deletion of exon 2, which encodes the first MORN (membrane occupation and recognition nexus) repeat, results in a frameshift and inactivation of Set7. Western blot and gene expression analyses confirmed that Set7 was absent in bone marrow (BM) of the homozygous *Setd7* KO mice (Figure 3A). Wild-type and *Setd7* KO mice were systemically administered a single intraperitoneal 1-mg dose of  $\beta$ -glucan as described previously (Cheng et al., 2014). Control mice were injected with endotoxin-free phosphate-buffered saline (PBS). Five days after  $\beta$ -glucan administration, the mice were challenged with intraperitoneal injections of 10  $\mu$ g of LPS, and after 3 h the serum levels of cytokines were quantified (Figure 3B). Contrasting the augmented pro-inflammatory cytokine production in wild-type mice administered  $\beta$ -glucan, mice lacking functional Set7 were unable to mount trained immunity against endotoxin challenge with regard to *TNF $\alpha$*  and *IL-1 $\beta$*  production. However, the effects of Set7 deletion on the trained production of *IL-6* *in vivo* are less clear, because *IL-6* production was already at high levels in wild-type mice that received PBS (Figure 3C).

The modulation of myeloid progenitors is an integral component of trained immunity (Christ et al., 2018; Kaufmann et al., 2018; Mitroulis et al., 2018), which can explain the sustained activation of the innate immune system beyond the short life span of circulating myeloid cells. A recent study showed that administration of  $\beta$ -glucan to mice resulted in the expansion and polarization of hematopoietic stem and progenitor cells (HSPCs) toward myelopoiesis, which was associated with elevated signaling by innate immune mediators such as *IL-1 $\beta$*  and granulocyte-macrophage colony-stimulating factor (GM-CSF), as well as changes in lipid and glucose metabolism (Mitroulis et al., 2018). To investigate the role of Set7 in these adaptations, we analyzed *Setd7* mRNA in the BM of wild-type mice and observed a trend to increase expression in mice administered  $\beta$ -glucan (Figure 3D). We replicated key findings of the previous study (Mitroulis et al., 2018), albeit in whole bone marrow, and found that  $\beta$ -glucan-dependent transcriptional induction of *Csf2* (GM-CSF) and *Il1b* was significantly reduced in *Setd7* KO mice. We also observed a reduction in the expression of the surrogate

marker for HSPCs *Cd34* in Set7 null mice; however, the expression of this gene remained elevated relative to Set7-null mice that received PBS injections (Figure 3E). These data demonstrate that Set7 regulates the *in vivo* pro-inflammatory cytokine response to induction of trained immunity by  $\beta$ -glucan and indicate an important role in hematopoietic adaptations that support the sustained phenotype.

### Set7 Regulates Key Metabolic Changes in Macrophages Trained with $\beta$ -Glucan

Trained immunity induced by  $\beta$ -glucan or BCG is characterized by metabolic reprogramming including increased glycolysis and intracellular accumulation of fumarate and mevalonate (Arts et al., 2016a; Bekkering et al., 2018). To explore the potential role of Set7 in the hallmark glycolytic metabolism of trained immunity, we measured extracellular lactate levels in day 6 macrophages trained with  $\beta$ -glucan. We observed a significant increase in these levels in  $\beta$ -glucan-trained cells that was abolished by co-incubation with 100  $\mu$ M CPH for the first 24 h of *in vitro* training (Figure 4A). In addition to changes in glycolysis, previous studies found that  $\beta$ -glucan training is accompanied by the repression of OXPHOS. In contrast to those findings (Cheng et al., 2014), we observed increased oxygen consumption at day 6 by cells trained with 1  $\mu$ g/mL  $\beta$ -glucan (Figure 4B). By performing parallel respirometry experiments with the Seahorse XF Extracellular Flux Analyzer and the Oxygraph-2k from Oroboros (the instrument used for measuring oxygen consumption by Cheng et al., 2014), we found that the stimulatory dose of  $\beta$ -glucan can explain the discrepancy between the current (increased oxygen consumption) and previously reported findings (decreased oxygen consumption) (Cheng et al., 2014). Specifically, we observed, using the Oxygraph-2k, training with 1  $\mu$ g/mL  $\beta$ -glucan stimulated oxygen consumption measured on day 6. On the other hand, the stimulatory dose of 10  $\mu$ g/mL described by Cheng et al. led to an overall reduction of oxygen consumption by trained macrophages (Figures S3A and S3B). To confirm these observations and to rule out donor-specific variation as the cause, we trained cells from the same set of donors with 1  $\mu$ g/mL  $\beta$ -glucan or 10  $\mu$ g/mL  $\beta$ -glucan and analyzed them in parallel using the Seahorse system. While both stimulatory doses showed a trend to increase the extracellular acidification rate, training with 1  $\mu$ g/mL  $\beta$ -glucan increased oxygen consumption, whereas training with 10  $\mu$ g/mL  $\beta$ -glucan reduced oxygen consumption for each donor (Figures S3C and S3D). Next, we sought to determine whether Set7 was mechanistically involved in the upregulation of OXPHOS by cells trained with  $\beta$ -glucan. Paralleling its attenuating effect on cytokine production, CPH blunted the increase in oxygen consumption induced by  $\beta$ -glucan (Figure 4B; open bars represent DMSO vehicle controls).

To understand the significance of this change in oxygen consumption for the induction of trained immunity, we investigated the effect of genetic variation on individual responses to  $\beta$ -glucan. Drawing from our genetic study of PBMCs isolated from 267 healthy volunteers (cohort 1; 300BCG), we tested for associations among common SNPs (minor allele frequency >5%) and variation in the magnitude of  $\beta$ -glucan-trained *TNF $\alpha$*  and *IL-6* responses of individual subjects. Although genome-wide significant cytokine quantitative trait loci (cQTLs) were not

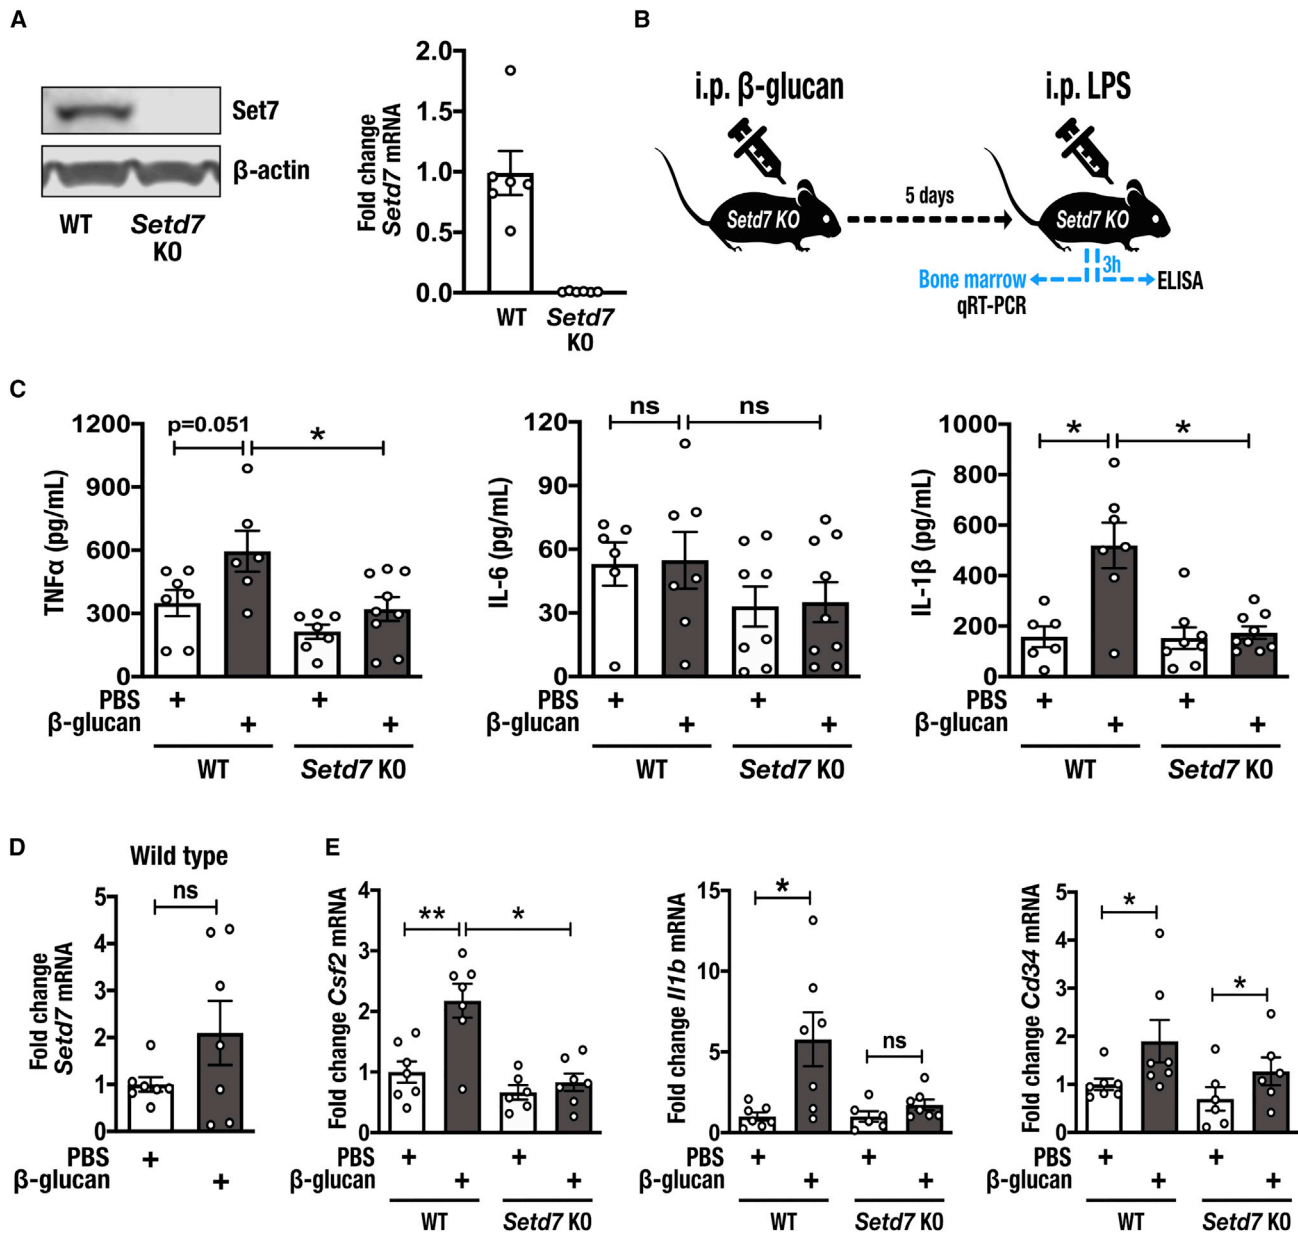

**Figure 3. *Set7* Regulates Trained Immunity Induced by  $\beta$ -Glucan *In Vivo***

(A) Representative western blot of *Set7* protein expression in the bone marrow of wild-type (WT) and *Setd7* KO mice.  $\beta$ -Actin was used as loading control. Expression of *Setd7* mRNA in the bone marrow of WT and *Setd7* KO mice (n = 7 mice per group).

(B) Schematic overview of *in vivo* induction of trained immunity by  $\beta$ -glucan.

(C) Plasma levels of TNF $\alpha$ , IL-6, and IL-1 $\beta$  in WT and *Setd7* KO mice trained with PBS or  $\beta$ -glucan on day 1 and administered LPS on day 6 (n = 6–9 mice per group).

(D) Day 6 analysis of *Setd7* mRNA expression in the bone marrow of WT mice administered PBS or  $\beta$ -glucan (n = 7 mice per group).

(E) Bone marrow mRNA expression of *Csf2*, *Il1b*, and *Cd34* in WT and *Setd7* KO mice trained with PBS or  $\beta$ -glucan on day 1 and administered LPS on day 6 (n = 6–7 mice per group).

Data are represented as mean  $\pm$  SEM. \*p < 0.05, \*\*p < 0.01, Mann-Whitney test.

observed, we identified numerous SNPs suggestively associated ( $p < 9.99 \times 10^{-3}$ ) with adaptive changes in pro-inflammatory cytokine production mapped within 250 kb of genes related to OXPHOS as well as genes encoding key tricarboxylic acid

(TCA) cycle enzymes. Variation in genes encoding isocitrate dehydrogenase enzymes was associated with the potentiation of TNF $\alpha$  production upon training with  $\beta$ -glucan. Similarly, variation in genes that encode subunits of the succinate dehydrogenase



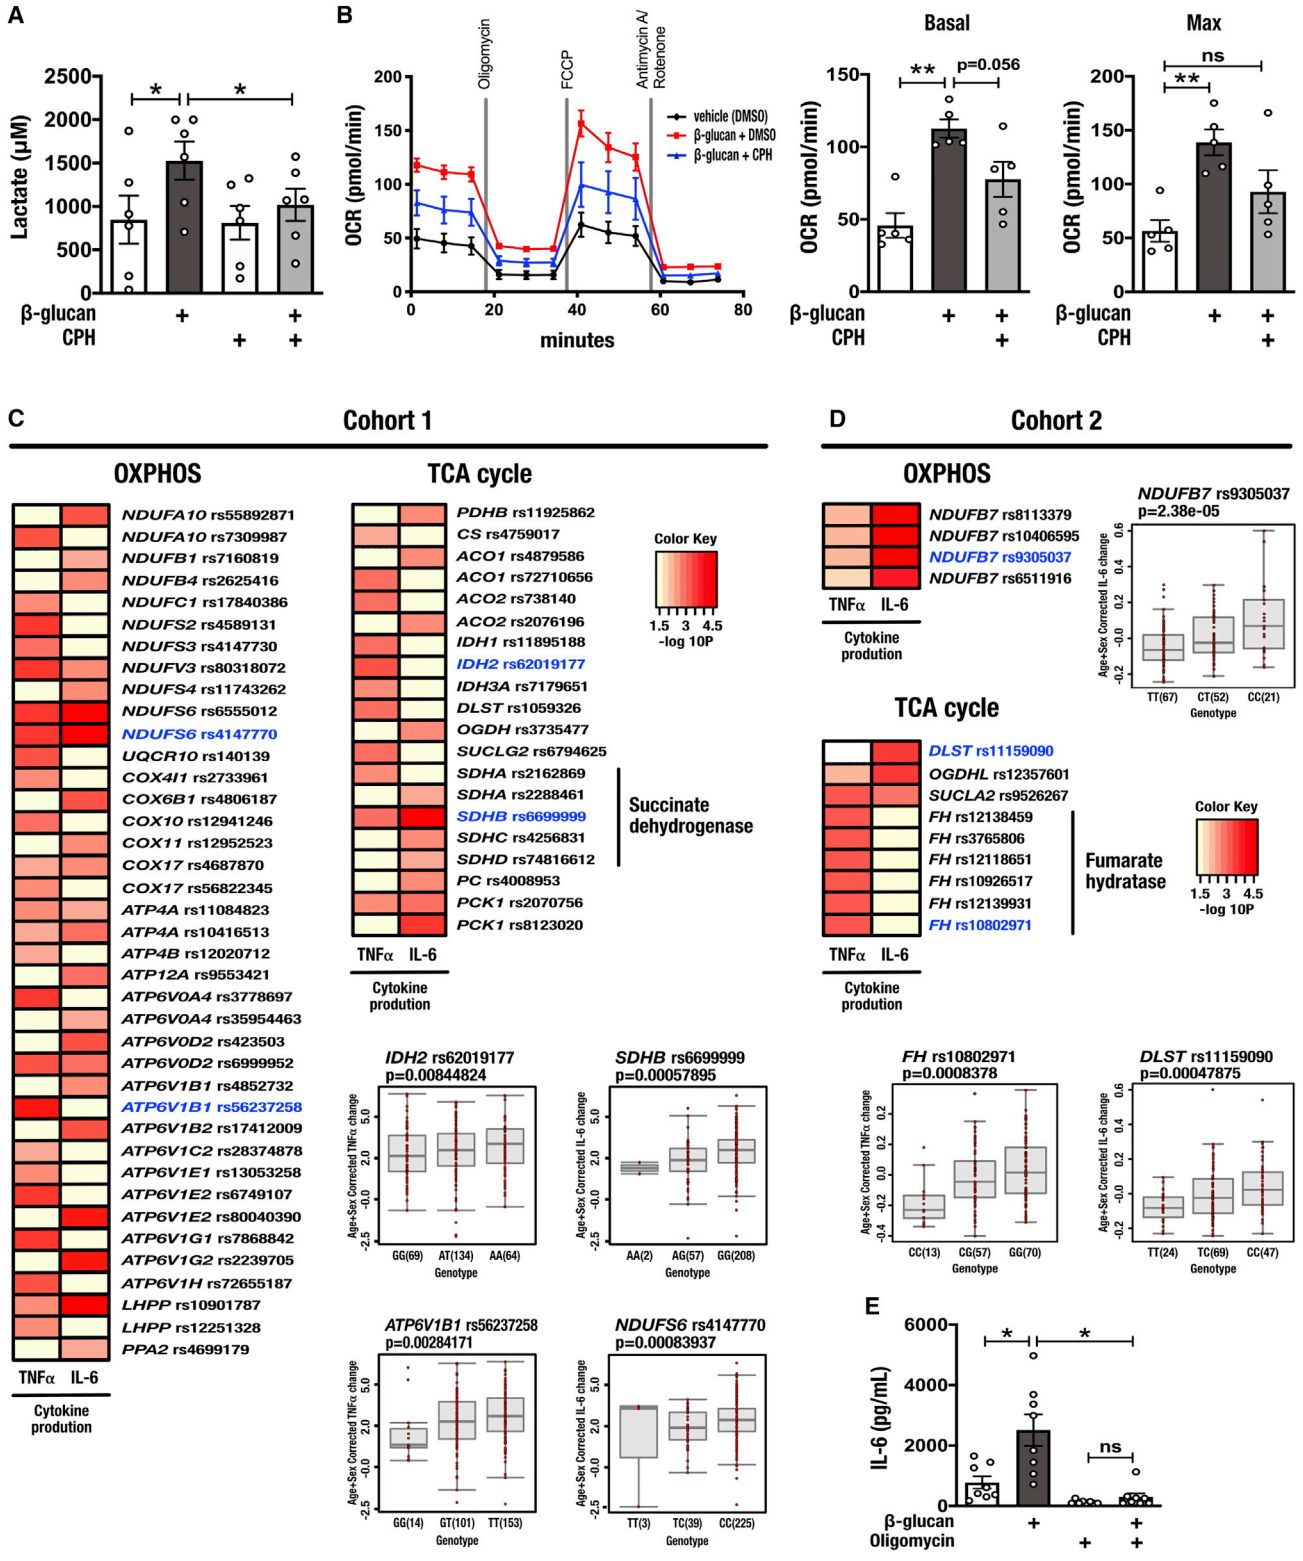

(legend on next page)

(SDH) complex, which oxidizes succinate to fumarate as a key component of the TCA cycle and ubiquinone to ubiquinol as complex II in the mitochondrial electron transport chain, was associated with IL-6 production. Other OXPHOS genes implicated by this study include those encoding various subunits of NADH:ubiquinone oxidoreductase (complex I of mitochondrial electron transport chain) (Figure 4C).

We validated the cytokine potentiating importance of plasticity in OXPHOS using a genetic study of PBMCs isolated from 119 healthy volunteers of Western European ancestry from the 200 Functional Genomics cohort (cohort 2; 200FG) of the Human Functional Genomics Study (<https://www.humanfunctionalgenomics.org>). In this second cohort, we observed a suggestive association ( $p < 9.99 \times 10^{-3}$ ) between IL-6 production and variation in the gene encoding mitochondrial electron transport chain complex I subunit *NDUFB7* (rs9305037  $p = 2.38 \times 10^{-5}$ ). Variation in fumarate hydratase (*FH*), which catalyzes the conversion of fumarate to malate in the TCA cycle, was associated with TNF $\alpha$  production in PBMCs trained with  $\beta$ -glucan. On the other hand, variation in dihydrolipoamide *s*-succinyltransferase (*DLST*), a component of the TCA cycle oxoglutarate dehydrogenase complex that catalyzes the conversion of 2-oxoglutarate to succinyl-CoA, was associated with variable IL-6 production (Figure 4D). To determine the physiological significance of this metabolic pathway to cytokine production in trained immunity, we inhibited OXPHOS with the F<sub>0</sub>F<sub>1</sub>-ATP synthase inhibitor oligomycin during restimulation with LPS, and observed a significant reduction in the IL-6 production capacity of cells trained with  $\beta$ -glucan (Figure 4E). These data collectively demonstrate that increased OXPHOS is necessary for induction of the trained phenotype by  $\beta$ -glucan and indicate a regulatory role for *Set7* in this metabolic adaptation.

### Set7 Regulates TCA Cycle Metabolite Production in Macrophages Trained with $\beta$ -Glucan

Previous studies reported induction of TCA cycle metabolites succinate, fumarate, and malate in monocytes and macrophages trained with  $\beta$ -glucan (Arts et al., 2016a). We were therefore prompted to investigate the role of *Set7* in these metabolic changes. Metabolite measurements revealed small, yet significant (fumarate, malate) differences between naive and trained cells after 24-h incubation with  $\beta$ -glucan. However, on day 6, the intracellular metabolism of  $\beta$ -glucan-trained cells was clearly distinguishable from untrained cells, with major differences observed for succinate, fumarate, malate, oxaloacetate, and citrate. Incubation with 100  $\mu$ M CPH for the first

24 h of the *in vitro* training protocol significantly inhibited the production of fumarate, and malate. By contrast, levels of succinate, oxaloacetate, and citrate were largely unaffected by CPH at either time point (Figure 5A; open bars represent DMSO vehicle controls).

To understand mechanisms underlying the immunometabolic modulatory effects of CPH, we measured the expression of genes encoding key enzymes involved in the regulation of the TCA cycle and OXPHOS (Figure 5B). Significant upregulation of *SUCLG1*, *FH*, and *MDH2* expression immediately following 24 h of stimulation with  $\beta$ -glucan was maintained or further elevated until at least day 6. A similar pattern, although not statistically significant at 24 h, was observed for *CS* expression. Importantly, incubation with CPH for the initial 24-h training period inhibited the  $\beta$ -glucan-induced activation of *FH* at the 24-h time point. Contrasting the upregulation of *MDH2* by  $\beta$ -glucan, expression of this gene in cells incubated with CPH during the initial 24-h training period was not significantly different from the control group at either time point (Figure 5C; open bars represent DMSO vehicle controls). Key to our observations of CPH-responsive  $\beta$ -glucan-induced fumarate accumulation is the activity of SDH. To explore the role of *Set7* in regulating this complex, we measured the expression of genes encoding individual SDH subunits. We observed significant transcriptional upregulation of *SDHB*, *SDHC*, and *SDHD* following 24 h of stimulation with  $\beta$ -glucan. For *SDHB* and *SDHD*, the expression was increased on day 6. Incubation with CPH during the initial 24-h training period revealed a tendency to prevent the  $\beta$ -glucan-induced transcriptional activation of *SDHB* at the 24-h and 6-day time points. In contrast to the upregulation of *SDHB* by  $\beta$ -glucan, expression of this gene in cells incubated with CPH during the initial 24-h training period was not significantly different from the control group at either time point (Figure 5D; open bars represent DMSO vehicle controls). To determine the importance of *Set7* for the control of *MDH2* and *SDHB* in trained immunity *in vivo*, we analyzed the expression of these genes in BM of wild-type and *Setd7* KO mice. Similar to our results for human cells, we observed a significant increase in the expression of *Mdh2* and *Sdhb* in wild-type mice that received  $\beta$ -glucan injections, which were not observed in *Setd7* KO mice. In contrast, we did not observe significant changes to *Fh1* or *Suclg1* expression (Figure 5E). These observations indicate a role for *Set7* in sustained metabolic gene changes associated with trained immunity via the persistent activation of *MDH2* and *SDHB*.

### Figure 4. Plasticity in the Induction of Oxidative Phosphorylation Is Important for the Pro-inflammatory Cytokine Production by Cells Trained by $\beta$ -Glucan

(A) Lactate production by  $\beta$ -glucan-trained macrophages incubated with CPH for the first 24 h of *in vitro* training ( $n = 6$  healthy volunteers). (B) Oxygen consumption analysis (seahorse) of macrophages 5 days after incubation with  $\beta$ -glucan and co-incubation with CPH. Basal and maximum oxygen consumption rates (OCR) are indicated ( $n = 5$  healthy volunteers; open bars represent DMSO vehicle controls). (C and D) Heatmap of the  $p$  values of association between SNPs mapped to genes involved in oxidative phosphorylation (OXPHOS) and the tricarboxylic acid (TCA) cycle and the magnitude of cytokine production capacity by PBMCs trained with  $\beta$ -glucan *in vitro* isolated from (C) 300BCG (cohort 1) and (D) 200FG (cohort 2). The color legend for the heatmap indicates the range of  $p$  values from QTL mapping. Boxplots show the genotype-stratified cytokine levels for the OXPHOS and TCA cycle loci (cohort 1,  $n = 238$  healthy volunteers for TNF $\alpha$ ,  $n = 251$  healthy volunteers for IL-6; cohort 2,  $n = 119$  healthy individuals). (E) Production of IL-6 by  $\beta$ -glucan-trained macrophages incubated with 1  $\mu$ M oligomycin for the first 24 h of *in vitro* training and restimulated with LPS ( $n = 8$  healthy volunteers).

Data are represented as mean  $\pm$  SEM. \* $p < 0.05$ , \*\* $p < 0.01$ , Wilcoxon signed-rank test or Mann-Whitney test where appropriate.

See also Figure S3.

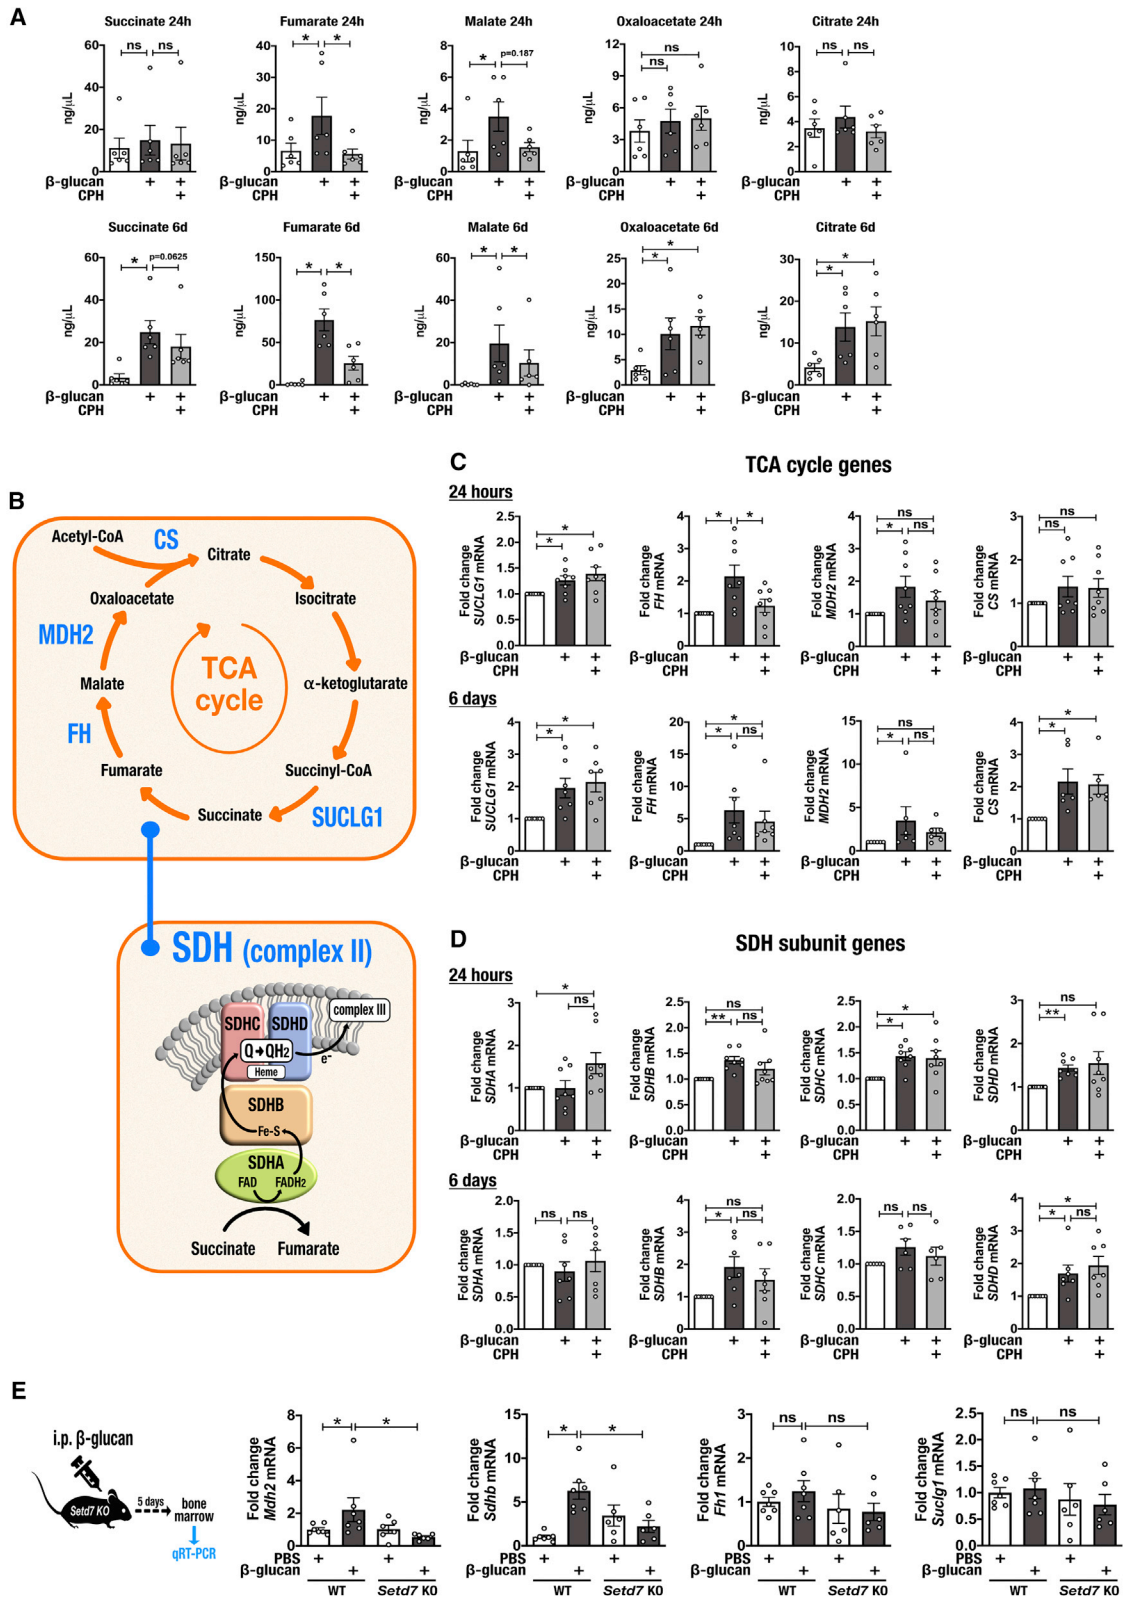

(legend on next page)

### Histone Methylation at Distal Enhancers Support Metabolic Reprogramming of Macrophages Trained with $\beta$ -Glucan

At the level of gene regulation, trained immunity induced by  $\beta$ -glucan is characterized by changes to chromatin modifications such as H3K4me1 (Novakovic et al., 2016; Saeed et al., 2014) that modulate transcriptional programs. In eukaryotes, H3K4me1 is predominantly enriched at enhancers—distal regulatory elements that, via chromatin remodeling events and looping of DNA, are brought into close proximity to physically interact with target promoters to fine-tune spatially and temporally restricted gene expression patterns. Three-dimensional chromatin structures, known as topologically associating domains (TADs), divide the genome into regions enriched in chromosomal looping contacts (Fanucchi and Mhlanga, 2019). Studies of chromatin architecture have begun to define the regulatory importance of TAD formation for the epigenetic priming and transcriptional memory of  $\beta$ -glucan-trained innate immune gene promoters (Fanucchi et al., 2019). Because previous studies demonstrated that metabolic changes occur upstream of enhanced cytokine production in trained immunity, we reasoned that H3K4me1 at enhancers associated with the regulation of metabolic genes could underpin the necessity of Set7 for the trained phenotype induced by  $\beta$ -glucan.

Drawing from the GeneHancer database of human enhancers and their inferred target genes (Fishilevich et al., 2017) as well as publicly accessible Pol II ChIA-PET data generated from K562 cells (GEO sample accession: GSM970213), we identified four enhancer regions that interact with *MDH2*. The most distal region (GeneHancer ID: GH07J075877) is approximately 3.1 kb in size and is located  $-169$  kb upstream of *MDH2*, spanning the promoter of *RHBDD2*. Three additional *MDH2* TAD enhancers, located in closer proximity downstream of *MDH2*, were identified as GH07J076068 (3.4 kb,  $+22.3$  kb from the *MDH2* transcription start site [TSS]), GH07J076104 (5.1 kb,  $+59.5$  kb from TSS), and GH07J076162 (4.9 kb,  $+117.1$  kb from TSS). Analysis of publicly accessible data derived from sequencing of immunoprecipitated chromatin (ChIP-seq) generated by the Blueprint Consortium (Adams et al., 2012) indicated that GH07J075877 and GH07J076162 became enriched for H3K4me1 in monocytes following stimulation with  $\beta$ -glucan for 24 h. By contrast, H3K4me1 at GH07J076068 and GH07J076104 was unaffected by  $\beta$ -glucan training (Figure 6A). The same approach identified three distal enhancers that interact within the *SDHB* TAD in K562 cells. GH07J017206 is approximately 3.1 kb in size and is located  $-152$  kb upstream of the *SDHB* TSS, residing at the first exon of *PADI1*. GH07J017126 is approximately 3.7 kb in

size and is located  $-74.7$  kb upstream of *SDHB*. Adjacent to this second regulatory element is a relatively smaller (approximately 1 kb) enhancer located  $-71.9$  kb upstream of *SDHB* (GH07J017125). Analysis of ChIP-seq data revealed specific enrichment for H3K4me1 at these *SDHB* TAD enhancers following 24-h stimulation of monocytes with  $\beta$ -glucan (Figure 6B).

We assessed the chromatin at enhancers within the *MDH2* domain on day 6 of the *in vitro* training protocol by ChIP and observed H3K4me1 enrichment in response to  $\beta$ -glucan at three discrete regions of GH07J075877, reaching statistical significance at region 1 (R1). The addition of 100  $\mu$ M CPH for the first 24 h of *in vitro* training attenuated this enrichment at R1 as well as at R2 and R4 on day 6. A similar pattern of  $\beta$ -glucan-induced and CPH-responsive H3K4me1 enrichment was also observed at GH07J076162, but not at GH07J076104 as predicted by ChIP-seq. However, contrasting the ChIP-seq data, we observed a trend toward H3K4me1 enrichment at GH07J076068 in cells trained with  $\beta$ -glucan (Figure 6C; open bars represent DMSO vehicle controls). Stimulation of monocytes with  $\beta$ -glucan also led to the sustained enrichment of H3K4me1 at enhancers within the *SDHB* TAD in day 6 macrophages. This was most pronounced at GH07J017206, where three regions (R1, R3, and R5) exhibited significant increases in H3K4me1 in response to  $\beta$ -glucan. Moreover, incubation with CPH for the first 24 h of *in vitro* training sufficiently attenuated this chromatin modification. Significant H3K4me1 enrichment was also observed at GH07J017126 (R2) and GH07J017125 (R1 and R2), reflecting an overall pattern of  $\beta$ -glucan-induced and CPH-responsive acquisition of H3K4me1 at *SDHB* enhancers (Figure 6D; open bars represent DMSO vehicle controls). To investigate the evolutionary conservation of enhancers regulating *MDH2* and *SDHB*, we compared the DNA sequence similarity across different species. For enhancers regulating *MDH2*, we observed a high level of conservation in mice for GH07J075877. In contrast, GH07J076068, GH07J076104, and GH07J076162 were poorly conserved (Figure S4). For enhancers regulating *SDHB*, we observed that GH01J017125 is partially conserved in mice. GH01J017126 is only conserved in primates, whereas GH01J017206 is conserved in all species analyzed (Figure S5). In contrast to enhancers of *MDH2* and *SDHB*, and consistent with gene expression data (Figures 5C and 5D),  $\beta$ -glucan did not induce significant changes to H3K4me1 at GH11J112155 and GH02J084740, which are associated with *SDHD* ( $+74.9$  kb from TSS) and *SUCLG1* ( $-281.5$  kb from TSS) regulation, respectively (Figure S6). Together, these data reveal chromatin-dependent mechanisms of TCA cycle gene regulation in trained immunity and strongly implicate Set7 in this epigenetic process.

#### Figure 5. Inhibition of Set7 Regulates Metabolic Changes in Macrophages Trained with $\beta$ -Glucan

(A) Key TCA cycle metabolite concentrations in primary human monocytes/macrophages measured 24 h and 5 days after incubation with  $\beta$ -glucan and co-incubation with CPH (n = 6 healthy volunteers; open bars represent DMSO vehicle controls).

(B) Schematic overview of the TCA cycle and succinate dehydrogenase (SDH) complex. Enzymes analyzed for gene expression in (C) and (D) are indicated.

(C) Expression analysis of genes encoding enzymes involved in the TCA cycle by primary human monocytes/macrophages measured 24 h and 5 days after incubation with  $\beta$ -glucan and co-incubation with 100  $\mu$ M CPH (n = 6–8 healthy volunteers; open bars represent DMSO vehicle controls).

(D) Expression analysis of genes encoding SDH subunits in primary human monocytes/macrophages measured 24 h and 5 days after incubation with  $\beta$ -glucan and co-incubation with 100  $\mu$ M CPH (n = 6–8 healthy volunteers; open bars represent DMSO vehicle controls).

(E) Bone marrow mRNA expression of *Mdh2*, *Sdhb*, *Fh1*, and *Suclg1* in WT and *Setd7* KO mice trained with PBS or  $\beta$ -glucan on day 1 and administered LPS on day 6 (n = 6–7 mice per group).

Data are represented as mean  $\pm$  SEM. \*p < 0.05, \*\*p < 0.01, Wilcoxon signed-rank test or Mann-Whitney test where appropriate.

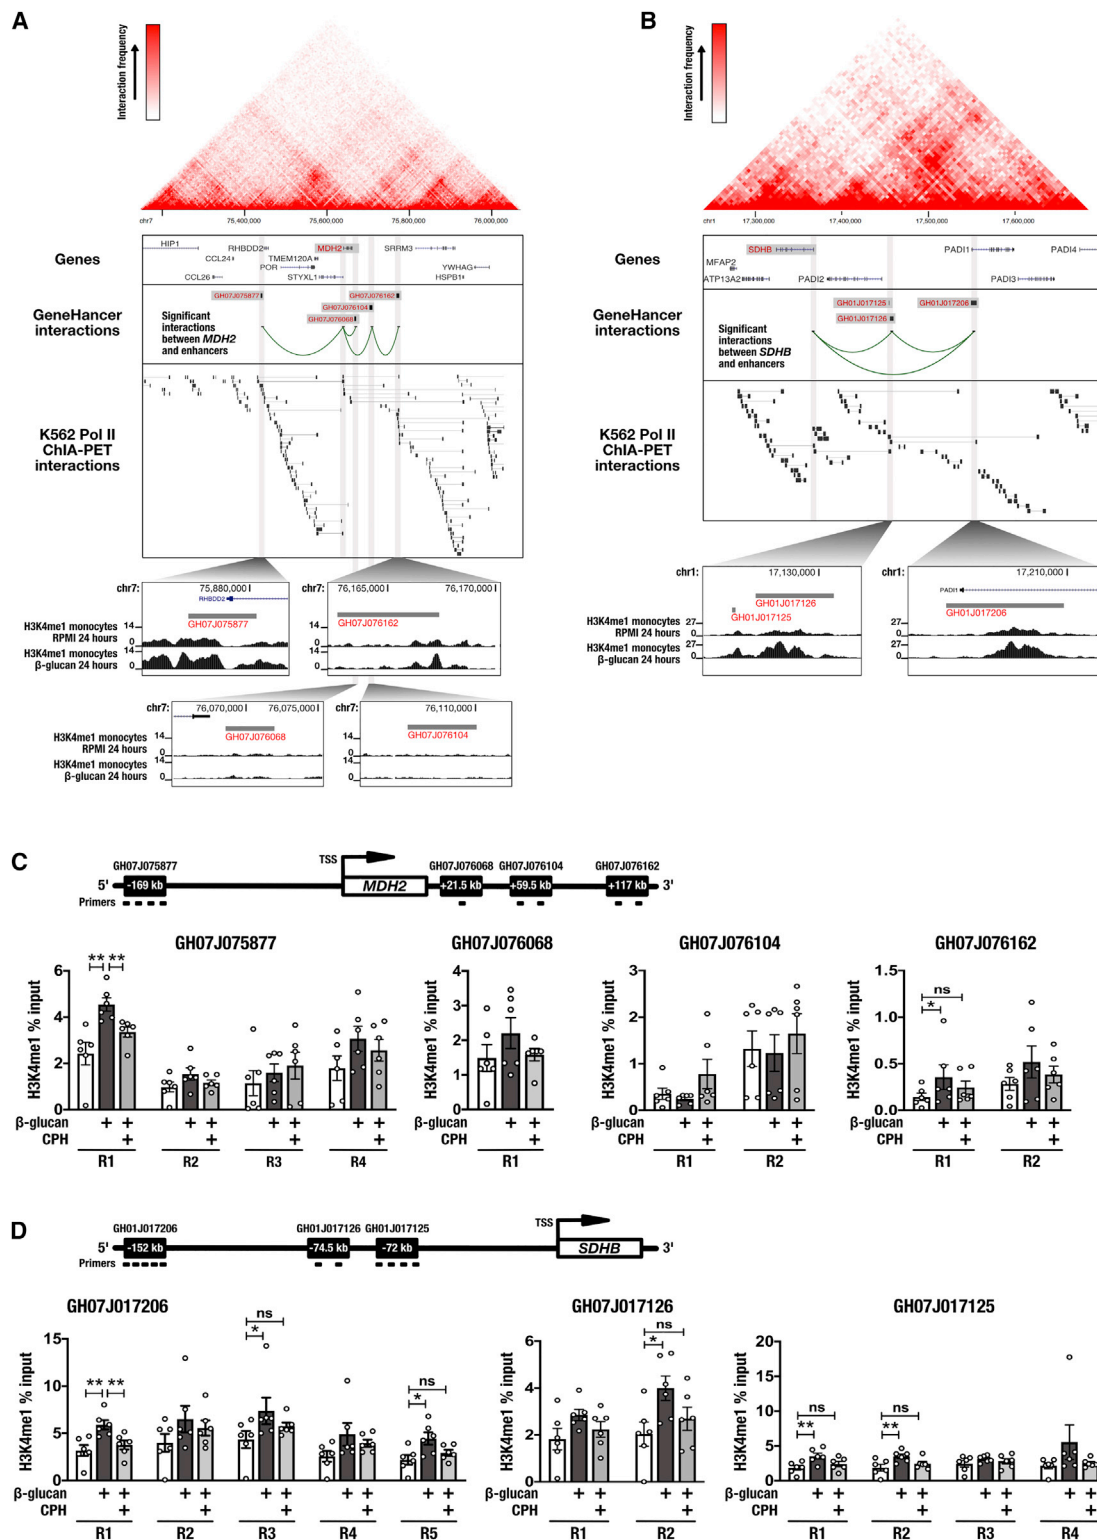

**Figure 6. H3K4me1 Changes at Distal Enhancers Regulating *MDH2* and *SDHB* Support Metabolic Reprogramming of Macrophages Trained with  $\beta$ -Glucan**

(A) Gene-enhancer interactions within the topologically associating domain (TAD) surrounding *MDH2* derived from ChIA-PET interactions in K562 cells (upper panel). ChIP-seq-derived H3K4me1 maps of these enhancer regions in monocytes stimulated with  $\beta$ -glucan for 24 h (lower panels).

(legend continued on next page)

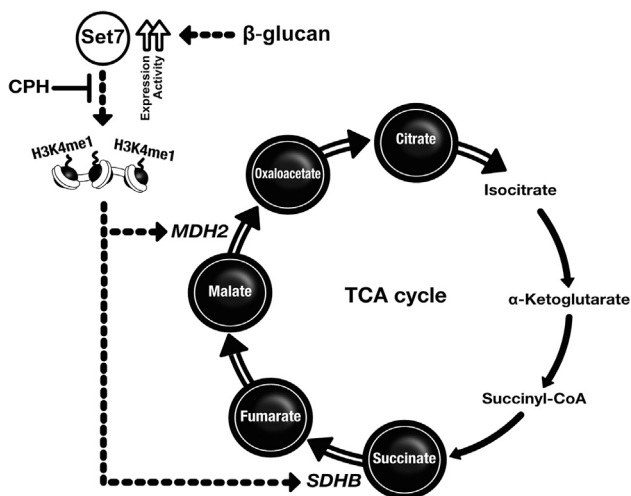

**Figure 7. Set7 Regulates Metabolic Changes in Cells Trained with  $\beta$ -Glucan**

$\beta$ -Glucan stimulation activates Set7 to write the H3K4me1 modification to distal enhancers associated with sustained *MDH2* and *SDHB* gene expression leading to increases in TCA cycle metabolites and increased oxidative phosphorylation important for enhanced cytokine production in trained immunity.

## DISCUSSION

Several experimental observations led us to investigate the role of Set7 in trained immunity. Set7 had been strongly implicated in transcriptional memory and specifically the persistent activation of the *RELA* gene by vascular endothelial cells in response to transient stimulation with a high concentration of glucose (Brasacchio et al., 2009; El-Osta et al., 2008), pointing to a role in the clinical phenomenon of metabolic memory in diabetes (Keating et al., 2018). With regard to innate immune cells, analysis of TNF $\alpha$ -stimulated THP-1s revealed that a large proportion of NF $\kappa$ B-dependent genes were attenuated by Set7 knockdown (Li et al., 2008). The second consideration is that the H3K4me1 chromatin-templated enzymatic product of Set7 is a characteristic feature of transcriptionally permissive regulatory elements such as enhancers (Heintzman et al., 2007). We previously demonstrated the persistence of H3K4me1 at decommissioned enhancers in trained cells, supporting the notion that H3K4me1 provides a mechanism for epigenetic memory induced by  $\beta$ -glucan (Saeed et al., 2014). The third argument for Set7 in trained immunity came from our previous transcriptome profiling studies of macrophages trained with  $\beta$ -glucan that identified specific activation of *SETD7* expression (Quintin et al., 2012). Indeed, the inhibition of Set7 for the initial 24-h training period is sufficient to attenuate the augmentation in pro-inflammatory

cytokine production, suggesting that Set7 plays an early role in establishing changes that underpin trained immunity.

The inability of *Setd7* KO mice to mount a  $\beta$ -glucan-induced amplified response to a secondary challenge of systemic inflammation highlights the importance of Set7 for trained immunity *in vivo*. Because mature monocytes have a short life span in the circulation relative to the duration of trained immunity, recent attention has turned to mechanistic processes acting at the level of myeloid precursors. Administration of  $\beta$ -glucan to mice induced a bias of HSPCs toward myelopoiesis and activated transcriptional and metabolic pathways associated with trained immunity at the expense of pathways associated with lymphopoiesis. Enhanced myelopoiesis was associated with elevated signaling by innate immune mediators such as IL-1 $\beta$  and GM-CSF (Mitroulis et al., 2018). Our analysis of total bone marrow validated the gene expression signature of *IL1b* and *Csf2* in animals administered  $\beta$ -glucan and revealed a striking inhibition of this effect in mice lacking functional Set7. Similarly, trained immunity is induced in myeloid progenitor cells with skewing toward myelopoiesis by high-cholesterol Western-type diet (WD) in mice. Involvement of the IL-1 pathway in this process argues for a role for Set7 in the sustained atherogenic inflammation associated with WD-induced trained immunity (Christ et al., 2018).

Specific metabolic pathways distinguish and support the spectrum of macrophage phenotypes and activation states. For trained immunity induced by  $\beta$ -glucan (Cheng et al., 2014) and BCG (Arts et al., 2016b), the process is characteristically reliant on enhanced glycolysis. Indeed, the attenuation of lactate production by CPH in cells trained with  $\beta$ -glucan indicates a role for Set7 in the glycolytic metabolism. Most remarkable are our observations supporting a role for Set7 in the upregulation of OXPHOS in  $\beta$ -glucan-trained cells. Previous studies indicated that brief exposure to a high concentration of  $\beta$ -glucan causes a classical Warburg shift to glycolysis at the expense of OXPHOS (Cheng et al., 2014), contrasting trained immunity induced by BCG (Arts et al., 2016b), which induces upregulation of both energy systems. Using measurements of metabolic flux and functional genomics, we underscore the importance of OXPHOS for the trained macrophage phenotype. Findings presented by the current study suggest that the disparity in terms of the role of OXPHOS arises from the stimulatory dose of  $\beta$ -glucan: a  $\beta$ -glucan concentration of 1  $\mu$ g/mL induces both glycolysis and OXPHOS, whereas a concentration of 10  $\mu$ g/mL induces glycolysis but inhibits OXPHOS (Cheng et al., 2014).

Accumulation of succinate, fumarate, and malate in trained cells was previously interpreted as anaplerotic repurposing of TCA cycle metabolism. The importance of these metabolic changes is highlighted by the observation that fumarate can partly recapitulate the training effects of  $\beta$ -glucan (Arts et al., 2016a). Our current data indicate that the amplified TCA cycle

(B) Gene-enhancer interactions within the TAD surrounding *SDHB* derived from ChIA-PET interactions in K562 cells (upper panel). ChIP-seq-derived H3K4me1 maps of these enhancer regions in monocytes stimulated with  $\beta$ -glucan for 24 h (lower panels).

(C) Levels of H3K4me1 at enhancer sites associated with the transcriptional regulation of *MDH2* in primary human macrophages measured 5 days after incubation with  $\beta$ -glucan and co-incubation with 100  $\mu$ M CPH (n = 6 healthy volunteers; open bars represent DMSO vehicle controls).

(D) Levels of H3K4me1 at enhancer sites associated with the transcriptional regulation of *SDHB* in primary human macrophages measured 5 days after incubation with  $\beta$ -glucan and co-incubation with 100  $\mu$ M CPH (n = 6 healthy volunteers; open bars represent DMSO vehicle controls).

Data are represented as mean  $\pm$  SEM. \*p < 0.05, \*\*p < 0.01, Wilcoxon signed-rank test.

See also Figures S4, S5, and S6.

in fact remains functional. Moreover, we show that the inhibitory effect of CPH during the first 24 h of *in vitro* training is sufficient to attenuate the augmented metabolite profiles in day 6 macrophages. Genes encoding important TCA cycle components were transcriptionally activated by  $\beta$ -glucan in a sustained and CPH-sensitive manner. This observation is particularly revealing for *SDHB*, which functions in the TCA cycle as well as OXPHOS.

Emerging evidence points toward specific chromatin structural organization in the transcriptional memory of  $\beta$ -glucan-trained innate immune gene promoters (Fanucchi et al., 2019). We propose that chromatin modifications associated with specific TAD formation contribute to the persistent transcriptional activation of key metabolic genes that support trained immunity. We observed H3K4me1 enrichment at distal enhancers that form regulatory domains with *MDH2* and *SDHB*, respectively, and are predicted to be involved in their transcriptional regulation. Inhibition of this enrichment by CPH during the first 24 h of *in vitro* training suggests a memory function for Set7-mediated H3K4me1 within the respective TADs of *MDH2* and *SDHB*. Our data largely mirror the H3K4me1 enrichment patterns of primary monocytes stimulated with  $\beta$ -glucan for 24 h. In contrast, we could not identify similar regulatory elements for *FH*.

While there is limited understanding of the factors that regulate structural genomic interactions, a central tenet of promoter-enhancer communication is the specific binding of transcription factors, which can be constrained to regulatory elements by chromatin modifications such as H3K4me1 (Stadhouders et al., 2019). In addition to H3 histones, Set7 controls the stability and function of several transcription factors by post-translational lysine methylation (Keating and El-Osta, 2013). One such transcription factor substrate is YY1, an important structural regulator of enhancer-promoter loops (Weintraub et al., 2017). Methylation of YY1 at K173 and K411 by Set7 modulates DNA binding and YY1-regulated gene transcription in HeLa cells (Zhang et al., 2016). While it is unclear whether similar processes govern innate immune transcriptional plasticity, several of the enhancers investigated in the current study harbor binding motifs for YY1 (data not shown).

Set7 is a crucial component of the cellular machinery responsible for the establishment and maintenance of metabolic and transcriptional memory programs that support the trained immunity phenotype induced by  $\beta$ -glucan. At least part of this role involves the regulation of OXPHOS at the level of chromatin modification and gene expression, with potentially important consequences for specific TCA cycle metabolites and downstream signaling events, including metabolite-dependent chromatin-modifying reactions (Arts et al., 2016a; Keating and El-Osta, 2015; Figure 7). Our study is limited by our focus on the role of Set7 in one aspect of  $\beta$ -glucan-mediated metabolic gene regulation. Further elucidation of this key regulatory circuitry will provide important mechanistic and physiological insights into trained immunity, and lead to the identification of strategies to enhance or dampen inflammatory responses in certain clinical settings.

## STAR★METHODS

Detailed methods are provided in the online version of this paper and include the following:

- KEY RESOURCES TABLE
- RESOURCE AVAILABILITY
  - Lead Contact
  - Materials Availability
  - Data and Code Availability
- EXPERIMENTAL MODEL AND SUBJECT DETAILS
  - Human subjects
  - Human cohorts
  - Mice
- METHOD DETAILS
  - Cells and reagents
  - *In vitro* training and pharmacological inhibition
  - Cytokine measurement
  - Annexin V/PI staining and lactate dehydrogenase (LDH) measurements for cell viability
  - Quantitative RT-PCR
  - Western blot analysis of primary human cells
  - Mouse experiments
  - Metabolic analysis
  - Oxygen consumption measurement
  - Metabolite measurements
  - Genetic analysis
  - ChIP-seq and ChIA-PET analysis
  - Chromatin immunoprecipitation
- QUANTIFICATION AND STATISTICAL ANALYSIS

## SUPPLEMENTAL INFORMATION

Supplemental Information can be found online at <https://doi.org/10.1016/j.celrep.2020.107548>.

## ACKNOWLEDGMENTS

The authors thank all volunteers who participated in the 200FG and 300BCG cohorts. The authors acknowledge Jori Wagenaars and Merel Adjobo-Hermans from the Department of Biochemistry, Radboud University Medical Center, Nijmegen, the Netherlands, for their experimental support. M.G.N. is supported by a European Research Council (ERC) Advanced Grant (833247) and a Spinoza grant of the Netherlands Organisation for Scientific Research. N.P.R. is recipient of a grant of the European Research Area Cardiovascular Disease (ERA-CVD) Joint Transnational Call 2018, which is supported by the Dutch Heart Foundation (JTC2018, project MEMORY; 2018T093). N.P.R., L.A.B.J., and M.G.N. received funding from the European Union Horizon 2020 Research and Innovation Program under Grant Agreement 667837, and the INCONTROL grant from the Heart Foundation Netherlands (CVON2012-03 and CVON2018-27). L.A.B.J. was supported by a Competitiveness Operational Programme grant of the Romanian Ministry of European Funds (HINT, ID P\_37\_762; MySMIS 103587). Y.L. was supported by the Radboud University Medical Center Hypatia Grant (2018). M.O. was supported by a VENI grant (016.176.006) from the Netherlands Organisation for Scientific Research (NWO). This study makes use of data generated by the Blueprint Consortium. A full list of the investigators who contributed to the generation of the data is available from <http://www.blueprint-epigenome.eu>. Funding for the project was provided by the European Union's Seventh Framework Programme (FP7/2007-2013) under Grant Agreement 282510 BLUEPRINT.

## AUTHOR CONTRIBUTIONS

Conceptualization, S.T.K., L.G., L.A.B.J., M.G.N., and N.P.R.; Methodology, S.T.K., L.G., C.D.C.v.d.H., J.C.d.S., H.R., J.H.v.P., L.H., M.P.N., J.O., E.P.B., W.J.H.K., M.G.N., and N.P.R.; Formal Analysis, S.T.K., L.G., C.D.C.v.d.H., H.R., J.C.d.S., S.F., J.O., H.K., J.H.v.P., V.M., Y.L., E.P.B., and W.J.H.K.; Investigation, S.T.K., L.G., C.D.C.v.d.H., H.R., J.C.d.S.,

S.F., J.O., K.H., J.H.v.P., L.H., M.P.N., L.C.J.d.B., V.A.C.M.K., S.J.C.F.M.M., V.P.M., J.D.-A., M.O., E.P.B., and W.J.H.K.; Writing—Original Draft, S.T.K.; Writing—Review and Editing, S.T.K., L.G., C.D.C.C.v.d.H., J.C.d.S., S.F., J.O., J.H.v.P., M.P.N., V.M., L.C.J.d.B., V.A.C.M.K., S.J.C.F.M.M., V.P.M., J.D.-A., M.O., E.P.B., W.J.H.K., L.A.B.J., M.G.N., and N.P.R.; Funding Acquisition, L.A.B.J., M.G.N., and N.P.R.; Supervision, J.O., M.M., A.E.-O., L.A.B.J., M.G.N., and N.P.R.

## DECLARATION OF INTERESTS

W.J.H.K. is a scientific advisor of Khondrion (Nijmegen, the Netherlands) and of Fortify Therapeutics. These subject matter experts had no involvement in the data collection, analysis and interpretation, writing of the manuscript, and the decision to submit the manuscript for publication.

Received: August 21, 2019

Revised: January 31, 2020

Accepted: March 31, 2020

Published: April 21, 2020

## REFERENCES

- Adams, D., Altucci, L., Antonarakis, S.E., Ballesteros, J., Beck, S., Bird, A., Bock, C., Boehm, B., Campo, E., Caricasole, A., et al. (2012). BLUEPRINT to decode the epigenetic signature written in blood. *Nat. Biotechnol.* **30**, 224–226.
- Allis, C.D., Berger, S.L., Cote, J., Dent, S., Jenuwien, T., Kouzarides, T., Pillus, L., Reinberg, D., Shi, Y., Shiekhata, R., et al. (2007). New nomenclature for chromatin-modifying enzymes. *Cell* **131**, 633–636.
- Arts, R.J., Novakovic, B., Ter Horst, R., Carvalho, A., Bekkering, S., Lachmandas, E., Rodrigues, F., Silvestre, R., Cheng, S.C., Wang, S.Y., et al. (2016a). Glutaminolysis and fumarate accumulation integrate immunometabolic and epigenetic programs in trained immunity. *Cell Metab.* **24**, 807–819.
- Arts, R.J.W., Carvalho, A., La Rocca, C., Palma, C., Rodrigues, F., Silvestre, R., Kleinnijenhuis, J., Lachmandas, E., Gonçalves, L.G., Belinha, A., et al. (2016b). Immunometabolic pathways in BCG-induced trained immunity. *Cell Rep.* **17**, 2562–2571.
- Bekkering, S., Quintin, J., Joosten, L.A., van der Meer, J.W., Netea, M.G., and Riksen, N.P. (2014). Oxidized low-density lipoprotein induces long-term proinflammatory cytokine production and foam cell formation via epigenetic reprogramming of monocytes. *Arterioscler. Thromb. Vasc. Biol.* **34**, 1731–1738.
- Bekkering, S., Arts, R.J.W., Novakovic, B., Kourtzelis, I., van der Heijden, C., Li, Y., Popa, C.D., Ter Horst, R., van Tuijl, J., Netea-Maier, R.T., et al. (2018). Metabolic induction of trained immunity through the mevalonate pathway. *Cell* **172**, 135–146.e9.
- Brasacchio, D., Okabe, J., Tikellis, C., Balcerzyk, A., George, P., Baker, E.K., Calkin, A.C., Brownlee, M., Cooper, M.E., and El-Osta, A. (2009). Hyperglycemia induces a dynamic cooperativity of histone methylase and demethylase enzymes associated with gene-activating epigenetic marks that coexist on the lysine tail. *Diabetes* **58**, 1229–1236.
- Cheng, S.C., Quintin, J., Cramer, R.A., Shepardson, K.M., Saeed, S., Kumar, V., Giamarellos-Bourboulis, E.J., Martens, J.H., Rao, N.A., Aghajani-Refah, A., et al. (2014). mTOR- and HIF-1 $\alpha$ -mediated aerobic glycolysis as metabolic basis for trained immunity. *Science* **345**, 1250684.
- Christ, A., Günther, P., Lauterbach, M.A.R., Duester, P., Biswas, D., Pelka, K., Scholz, C.J., Oosting, M., Haendler, K., Baßler, K., et al. (2018). Western diet triggers NLRP3-dependent innate immune reprogramming. *Cell* **172**, 162–175.e14.
- Denisenko, E., Guler, R., Mhlanga, M.M., Suzuki, H., Brombacher, F., and Schmeier, S. (2017). Genome-wide profiling of transcribed enhancers during macrophage activation. *Epigenetics Chromatin* **10**, 50.
- El-Osta, A., Brasacchio, D., Yao, D., Poci, A., Jones, P.L., Roeder, R.G., Cooper, M.E., and Brownlee, M. (2008). Transient high glucose causes persistent epigenetic changes and altered gene expression during subsequent normoglycemia. *J. Exp. Med.* **205**, 2409–2417.
- Fanucchi, S., and Mhlanga, M.M. (2019). Lnc-ing trained immunity to chromatin architecture. *Front. Cell Dev. Biol.* **7**, 2.
- Fanucchi, S., Fok, E.T., Dalla, E., Shibayama, Y., Börner, K., Chang, E.Y., Stoychev, S., Imakaev, M., Grimm, D., Wang, K.C., et al. (2019). Immune genes are primed for robust transcription by proximal long noncoding RNAs located in nuclear compartments. *Nat. Genet.* **51**, 138–150.
- Fishilevich, S., Nudel, R., Rappaport, N., Hadar, R., Plaschkes, I., Iny Stein, T., Rosen, N., Kohn, A., Twik, M., Safran, M., et al. (2017). GeneHancer: genome-wide integration of enhancers and target genes in GeneCards. Database (Oxford) **2017**, bax028.
- Garcia-Valtanen, P., Guzman-Genuino, R.M., Williams, D.L., Hayball, J.D., and Diener, K.R. (2017). Evaluation of trained immunity by  $\beta$ -1, 3 (d)-glucan on murine monocytes in vitro and duration of response in vivo. *Immunol. Cell Biol.* **95**, 601–610.
- Gnaiger, E. (2001). Bioenergetics at low oxygen: dependence of respiration and phosphorylation on oxygen and adenosine diphosphate supply. *Respir. Physiol.* **128**, 277–297.
- Gosselin, D., Link, V.M., Romanoski, C.E., Fonseca, G.J., Eichenfield, D.Z., Spann, N.J., Stender, J.D., Chun, H.B., Garner, H., Geissmann, F., and Glass, C.K. (2014). Environment drives selection and function of enhancers controlling tissue-specific macrophage identities. *Cell* **159**, 1327–1340.
- Hamidi, T., Singh, A.K., Veland, N., Vemulapalli, V., Chen, J., Hardikar, S., Bao, J., Fry, C.J., Yang, V., Lee, K.A., et al. (2018). Identification of Rpl29 as a major substrate of the lysine methyltransferase Set7/9. *J. Biol. Chem.* **293**, 12770–12780.
- Heintzman, N.D., Stuart, R.K., Hon, G., Fu, Y., Ching, C.W., Hawkins, R.D., Barrera, L.O., Van Calcar, S., Qu, C., Ching, K.A., et al. (2007). Distinct and predictive chromatin signatures of transcriptional promoters and enhancers in the human genome. *Nat. Genet.* **39**, 311–318.
- Kaufmann, E., Sanz, J., Dunn, J.L., Khan, N., Mendonça, L.E., Pacis, A., Tzelepis, F., Pernet, E., Dumaine, A., Grenier, J.C., et al. (2018). BCG educates hematopoietic stem cells to generate protective innate immunity against tuberculosis. *Cell* **172**, 176–190.e19.
- Keating, S.T., and El-Osta, A. (2013). Transcriptional regulation by the Set7 lysine methyltransferase. *Epigenetics* **8**, 361–372.
- Keating, S.T., and El-Osta, A. (2015). Epigenetics and metabolism. *Circ. Res.* **116**, 715–736.
- Keating, S.T., Ziemann, M., Okabe, J., Khan, A.W., Balcerzyk, A., and El-Osta, A. (2014). Deep sequencing reveals novel Set7 networks. *Cell. Mol. Life Sci.* **71**, 4471–4486.
- Keating, S.T., van Diepen, J.A., Riksen, N.P., and El-Osta, A. (2018). Epigenetics in diabetic nephropathy, immunity and metabolism. *Diabetologia* **61**, 6–20.
- Kent, W.J., Sugnet, C.W., Furey, T.S., Roskin, K.M., Pringle, T.H., Zahler, A.M., and Haussler, D. (2002). The human genome browser at UCSC. *Genome Res.* **12**, 996–1006.
- Kleinnijenhuis, J., Quintin, J., Preijers, F., Joosten, L.A., Iffrim, D.C., Saeed, S., Jacobs, C., van Loenhout, J., de Jong, D., Stunnenberg, H.G., et al. (2012). Bacille Calmette-Guérin induces NOD2-dependent nonspecific protection from reinfection via epigenetic reprogramming of monocytes. *Proc. Natl. Acad. Sci. USA* **109**, 17537–17542.
- Li, Y., Reddy, M.A., Miao, F., Shanmugam, N., Yee, J.K., Hawkins, D., Ren, B., and Natarajan, R. (2008). Role of the histone H3 lysine 4 methyltransferase, SET7/9, in the regulation of NF- $\kappa$ B-dependent inflammatory genes. Relevance to diabetes and inflammation. *J. Biol. Chem.* **283**, 26771–26781.
- Li, Y., Oosting, M., Deelen, P., Ricaño-Ponce, I., Smeekens, S., Jaeger, M., Matzaraki, V., Swertz, M.A., Xavier, R.J., Franke, L., et al. (2016). Inter-individual variability and genetic influences on cytokine responses to bacteria and fungi. *Nat. Med.* **22**, 952–960.
- Mitroulis, I., Ruppova, K., Wang, B., Chen, L.S., Grzybek, M., Grinenko, T., Eugster, A., Troullinaki, M., Palladini, A., Kourtzelis, I., et al. (2018). Modulation of myelopoietic progenitors is an integral component of trained immunity. *Cell* **172**, 147–161.e12.



- Netea, M.G., Domínguez-Andrés, J., Barreiro, L.B., Chavakis, T., Divangahi, M., Fuchs, E., Joosten, L.A.B., van der Meer, J.W.M., Mhlanga, M.M., Mulder, W.J.M., et al. (2020). Defining trained immunity and its role in health and disease. *Nat. Rev. Immunol.* Published online March 4, 2020. <https://doi.org/10.1038/s41577-020-0285-6>.
- Nishioka, K., Chuikov, S., Sarma, K., Erdjument-Bromage, H., Allis, C.D., Tempst, P., and Reinberg, D. (2002). Set9, a novel histone H3 methyltransferase that facilitates transcription by precluding histone tail modifications required for heterochromatin formation. *Genes Dev.* *16*, 479–489.
- Novakovic, B., Habibi, E., Wang, S.Y., Arts, R.J.W., Davar, R., Megchelenbrink, W., Kim, B., Kuznetsova, T., Kox, M., Zwaag, J., et al. (2016). beta-Glucan reverses the epigenetic state of LPS-induced immunological tolerance. *Cell* *167*, 1354–1368.e14.
- Okabe, J., Orłowski, C., Balcerzyk, A., Tikellis, C., Thomas, M.C., Cooper, M.E., and El-Osta, A. (2012). Distinguishing hyperglycemic changes by Set7 in vascular endothelial cells. *Circ. Res.* *110*, 1067–1076.
- Petit, J., Embregts, C.W.E., Forlenza, M., and Wiegertjes, G.F. (2019). Evidence of trained immunity in a fish: conserved features in carp macrophages. *J. Immunol.* *203*, 216–224.
- Quintin, J., Saeed, S., Martens, J.H.A., Giamarellos-Bourboulis, E.J., Ifrim, D.C., Logie, C., Jacobs, L., Jansen, T., Kullberg, B.J., Wijmenga, C., et al. (2012). *Candida albicans* infection affords protection against reinfection via functional reprogramming of monocytes. *Cell Host Microbe* *12*, 223–232.
- Saeed, S., Quintin, J., Kerstens, H.H., Rao, N.A., Aghajani-Refah, A., Matarese, F., Cheng, S.C., Ratter, J., Berentsen, K., van der Ent, M.A., et al. (2014). Epigenetic programming of monocyte-to-macrophage differentiation and trained innate immunity. *Science* *345*, 1251086.
- Sasaki, K., Doi, S., Nakashima, A., Irifuku, T., Yamada, K., Kokoroishi, K., Ueno, T., Doi, T., Hida, E., Arihiro, K., et al. (2016). Inhibition of SET domain-containing lysine methyltransferase 7/9 ameliorates renal fibrosis. *J. Am. Soc. Nephrol.* *27*, 203–215.
- Stadhouders, R., Filion, G.J., and Graf, T. (2019). Transcription factors and 3D genome conformation in cell-fate decisions. *Nature* *569*, 345–354.
- Takemoto, Y., Ito, A., Niwa, H., Okamura, M., Fujiwara, T., Hirano, T., Handa, N., Umehara, T., Sonoda, T., Ogawa, K., et al. (2016). Identification of cyproheptadine as an inhibitor of SET domain containing lysine methyltransferase 7/9 (Set7/9) that regulates estrogen-dependent transcription. *J. Med. Chem.* *59*, 3650–3660.
- Tamura, R., Doi, S., Nakashima, A., Sasaki, K., Maeda, K., Ueno, T., and Masaki, T. (2018). Inhibition of the H3K4 methyltransferase SET7/9 ameliorates peritoneal fibrosis. *PLoS ONE* *13*, e0196844.
- van der Valk, F.M., Bekkering, S., Kroon, J., Yeang, C., Van den Bossche, J., van Buul, J.D., Ravandi, A., Nederveen, A.J., Verberne, H.J., Scipione, C., et al. (2016). Oxidized phospholipids on lipoprotein(a) elicit arterial wall inflammation and an inflammatory monocyte response in humans. *Circulation* *134*, 611–624.
- Wang, H., Cao, R., Xia, L., Erdjument-Bromage, H., Borchers, C., Tempst, P., and Zhang, Y. (2001). Purification and functional characterization of a histone H3-lysine 4-specific methyltransferase. *Mol. Cell* *8*, 1207–1217.
- Wang, Y., Song, F., Zhang, B., Zhang, L., Xu, J., Kuang, D., Li, D., Choudhary, M.N.K., Li, Y., Hu, M., et al. (2018). The 3D Genome Browser: a web-based browser for visualizing 3D genome organization and long-range chromatin interactions. *Genome Biol.* *19*, 151.
- Weintraub, A.S., Li, C.H., Zamudio, A.V., Sigova, A.A., Hannett, N.M., Day, D.S., Abraham, B.J., Cohen, M.A., Nabet, B., Buckley, D.L., et al. (2017). YY1 is a structural regulator of enhancer-promoter loops. *Cell* *171*, 1573–1588.e28.
- Zhang, W.J., Wu, X.N., Shi, T.T., Xu, H.T., Yi, J., Shen, H.F., Huang, M.F., Shu, X.Y., Wang, F.F., Peng, B.L., et al. (2016). Regulation of transcription factor Yin Yang 1 by SET7/9-mediated Lysine methylation. *Sci. Rep.* *6*, 21718.

## STAR★METHODS

### KEY RESOURCES TABLE

| REAGENT or RESOURCE                                    | SOURCE                                                                 | IDENTIFIER                                                                                    |
|--------------------------------------------------------|------------------------------------------------------------------------|-----------------------------------------------------------------------------------------------|
| <b>Antibodies</b>                                      |                                                                        |                                                                                               |
| Rabbit monoclonal anti-mono-methyl-Histone H3 (Lys4)   | Cell Signaling Technology                                              | Cat#5326; RRID: AB_10695148                                                                   |
| Rabbit monoclonal anti-di-methyl-Rpl29 (Lys5)          | Cell Signaling Technology                                              | Cat#19495; RRID: AB_2798819                                                                   |
| Rabbit polyclonal anti-Set7                            | Cell Signaling Technology                                              | Cat#2813; RRID: AB_823636                                                                     |
| Rabbit polyclonal anti-HSP90                           | Cell Signaling Technology                                              | Cat#4874; RRID: AB_2121214                                                                    |
| Rabbit polyclonal anti- $\beta$ -actin                 | Sigma-Aldrich                                                          | Cat#A2066; RRID: AB_476693                                                                    |
| Mouse monoclonal anti- $\beta$ -actin                  | Cell Signaling Technology                                              | Cat#3700; RRID: AB_2242334                                                                    |
| swine-anti-rabbit Ig polyclonal secondary HRP antibody | Dako                                                                   | Cat#P0217; RRID: AB_2728719                                                                   |
| <b>Chemicals, Peptides, and Recombinant Proteins</b>   |                                                                        |                                                                                               |
| $\beta$ -glucan (b1,3-(D)-glucan)                      | Professor David Williams,<br>College of Medicine, Johnson<br>City, USA | N/A                                                                                           |
| Lipopolysaccharide                                     | Sigma-Aldrich                                                          | Cat#L2880 From E.coli serotype 055:B5                                                         |
| Percoll                                                | Sigma-Aldrich                                                          | Cat#P1644                                                                                     |
| Ficoll-Paque                                           | GE Healthcare                                                          | Cat#17-1440-03                                                                                |
| Roswell Park Memorial Institute medium (RPMI)          | Invitrogen                                                             | Cat#22406031                                                                                  |
| iScript reverse transcriptase                          | Bio-Rad                                                                | Cat#1708840                                                                                   |
| TRIzol reagent                                         | Life Technologies                                                      | Cat#15596018                                                                                  |
| SYBR Green                                             | Applied Biosciences                                                    | Cat#4368708                                                                                   |
| 16% Formaldehyde                                       | Fisher Scientific                                                      | Cat#28908                                                                                     |
| Cyproheptadine                                         | Selleckchem                                                            | Cat#S2044                                                                                     |
| Sinefungin                                             | Sigma-Aldrich                                                          | Cat#S8559                                                                                     |
| Bacillus Calmette–Guérin vaccine                       | Statens Serum Institut,<br>Copenhagen, Denmark                         | N/A                                                                                           |
| Laminarin                                              | Sigma-Aldrich                                                          | Cat#L9634                                                                                     |
| Diphenhydramide hydrochloride                          | Sigma-Aldrich                                                          | Cat#D3630                                                                                     |
| <b>Critical Commercial Assays</b>                      |                                                                        |                                                                                               |
| Pierce BCA protein assay kit                           | ThermoFisher Scientific                                                | Cat#23225                                                                                     |
| Human TNF $\alpha$ DuoSet ELISA                        | R&D systems                                                            | Cat#DY210                                                                                     |
| Human IL-6 DuoSet ELISA                                | R&D systems                                                            | Cat#DY206                                                                                     |
| Mouse TNF $\alpha$ Quantikine ELISA                    | R&D systems                                                            | Cat#MTA00B                                                                                    |
| Mouse IL-6 Quantikine ELISA                            | R&D systems                                                            | Cat#M6000B                                                                                    |
| Mouse IL-1 $\beta$ Quantikine ELISA                    | R&D systems                                                            | Cat#MLB00C                                                                                    |
| Lactate Fluorometric Assay kit                         | Biovision                                                              | Cat#K607                                                                                      |
| MinElute PCR purification column                       | QIAGEN                                                                 | Cat#28006                                                                                     |
| iScript cDNA synthesis kit                             | Bio-Rad                                                                | Cat#1708891                                                                                   |
| Cytox 96 assay                                         | Promega                                                                | Cat#G1780                                                                                     |
| Succinate colorimetric assay kit                       | Sigma-Aldrich                                                          | Cat#MAK184                                                                                    |
| Fumarate colorimetric assay kit                        | Sigma-Aldrich                                                          | Cat#MAK060                                                                                    |
| Malate colorimetric assay kit                          | Sigma-Aldrich                                                          | Cat#MAK067                                                                                    |
| Oxaloacetate colorimetric assay kit                    | Sigma-Aldrich                                                          | Cat#MAK070                                                                                    |
| Citrate colorimetric assay kit                         | Sigma-Aldrich                                                          | Cat#MAK057                                                                                    |
| <b>Experimental Models: Organisms/Strains</b>          |                                                                        |                                                                                               |
| 300BCG cohort (Human Functional Genomics Project)      | N/A                                                                    | <a href="https://www.humanfunctionalgenomics.org">https://www.humanfunctionalgenomics.org</a> |
| 200FG cohort (Human Functional Genomics Project)       | N/A                                                                    | <a href="https://www.humanfunctionalgenomics.org">https://www.humanfunctionalgenomics.org</a> |

(Continued on next page)

**Continued**

| REAGENT or RESOURCE          | SOURCE                                                   | IDENTIFIER                                                      |
|------------------------------|----------------------------------------------------------|-----------------------------------------------------------------|
| <i>Setd7</i> knockout mouse  | Professor Assam El-Osta,<br>Monash University, Melbourne | N/A                                                             |
| Oligonucleotides             |                                                          |                                                                 |
| See <a href="#">Table S1</a> | This paper                                               | N/A                                                             |
| Software and Algorithms      |                                                          |                                                                 |
| GraphPad Prism 8.12          | Graphpad software                                        | <a href="https://www.graphpad.com">https://www.graphpad.com</a> |
| R statistical programming    | N/A                                                      | RRID:SCR_001905                                                 |

**RESOURCE AVAILABILITY****Lead Contact**

Further information and requests for resources and reagents should be directed to and will be fulfilled by the Lead Contact, Niels P. Riksen ([niels.riksen@radboudumc.nl](mailto:niels.riksen@radboudumc.nl)).

**Materials Availability**

This study did not generate new unique reagents.

**Data and Code Availability**

This study did not generate any unique datasets or code.

**EXPERIMENTAL MODEL AND SUBJECT DETAILS****Human subjects**

With regard to the *in vitro* studies, buffy coats from male and female healthy donors were obtained after written informed consent (Sanquin blood bank, Nijmegen, the Netherlands). Cells were isolated and experiments conducted on the same day.

**Human cohorts**

The 300BCG cohort consists of 267 healthy males and females of Western European ancestry. The second cohort consists of 119 healthy individuals of Western European ancestry from the 200 Functional Genomics cohort (2011/399) of the Human Functional Genomics Project. The 300BCG cohort and 200FG cohort studies were approved by the local ethics committee (CMO regio Arnhem-Nijmegen, number NL58553.091.16 and number 2011-399, respectively). Inclusion of volunteers and experiments were conducted according to the principles expressed in the Declaration of Helsinki. All volunteers gave written informed consent before any material was taken.

**Mice**

The *Setd7* knockout (KO) mice were generated by genOway (Lyon, France). The *Setd7* targeting vector was designed within the first MORN domain of exon 2 containing two loxP sites (unpublished data). Insertion of loxP sites was introduced 1.6kb upstream of exon 2 by the integration of a loxP-flanked neomycine cassette. A targeting vector containing loxP sites flanking exon 2 of the *Setd7* gene was integrated by homologous recombination in mouse embryonic stem cells. Recombinant clones were injected into mouse C57BL/6J strain blastocysts and implanted into pseudopregnant females. Once the construct was integrated into C57BL/6J background mice, it was crossed with a CMV promoter-driven Cre recombinase mouse to create a constitutive *Setd7* KO mouse. Wild-type and *Setd7* KO mice housed under specific pathogen-free conditions were used at the age of 9-11 weeks. Food and water was provided *ad libitum*. All animal studies were approved by the Alfred Medical Research and Education Precinct (AMREP) Animal Ethics Committee under guidelines laid down by the National Health and Medical Research Council (NHMRC) of Australia.

**METHOD DETAILS****Cells and reagents**

Human peripheral blood mononuclear cells (PBMCs) were isolated from healthy volunteers by density-gradient centrifugation over Ficoll-Paque (GE Healthcare). Percoll isolation of monocytes was performed as previously described ([Arts et al., 2016a](#)). Cells were cultured in RPMI 1640 Dutch-modified culture medium (RPMI medium, Invitrogen) supplemented with 10  $\mu$ g/mL gentamicin (Centraform), 2 mM Glutamax (Invitrogen), 1 mM pyruvate (Invitrogen), and 10% pooled human serum. Stimuli and inhibitors used were *Escherichia coli* lipopolysaccharide (LPS; serotype 055:B5, Sigma-Aldrich, 10 ng/mL), and Pam3Cys (EMC microcollections,

L2000, 10  $\mu\text{g}/\text{mL}$ , Laminarin (Sigma), BCG (Statens Serum Institut, Copenhagen, Denmark), cyproheptadine (Selleckchem), sinefungin (Sigma), and diphenhydramide (Sigma).

### **In vitro training and pharmacological inhibition**

$\beta$ -1,3-(D)-glucan ( $\beta$ -glucan) was kindly provided by Professor David Williams (College of Medicine, Johnson City, USA). For isolation of cell wall  $\beta$ -glucans *C. albicans* was cultivated in 25 mL of YPD (1% yeast extract, 2% dextrose, 2% peptone) for 48 hours at 30°C. The cells were harvested by centrifugation at 5,000x g for 5 minutes and pellet washed once with dH<sub>2</sub>O. The washed cell pellets were then frozen at -20°C overnight. Prior to extracting the cell wall  $\beta$ -glucans, the cell pellets were subjected to repeated freeze-thaw cycles (3X) to lyse the cells. Cell pellets were then extracted with a base/acid isolation approach. The supernatant contained the water soluble mannans. Glucans are water insoluble and were harvested by centrifugation and washing in dH<sub>2</sub>O prior to lyophilization. The structure and purity of the  $\beta$ -glucans was determined by solution, high field one and two-dimensional Nuclear Magnetic Resonance Spectroscopy (1 and 2-D NMR).

Adherent monocytes were trained as described previously (Bekkering et al., 2014). Cells were incubated with  $\beta$ -glucan (1  $\mu\text{g}/\text{mL}$ ), Laminarin (1 mg/mL), or BCG (5  $\mu\text{g}/\text{mL}$ ) for 24 hours, washed with warm phosphate buffered saline (PBS) and incubated in normal culture medium at 37°C, 5% CO<sub>2</sub>. For pharmacological inhibition experiments, cells were pre-incubated with cyproheptadine (25-100  $\mu\text{M}$ ), sinefungin (1, 10, 50, and 100  $\mu\text{g}/\text{mL}$ ), or diphenhydramide (10, 50, 100  $\mu\text{g}/\text{mL}$ ), for 1 hour prior to stimulation. Following 5 days in culture, cells were restimulated with medium alone, 10 ng/mL LPS, or 10  $\mu\text{g}/\text{mL}$  Pam3Cys for 24 hours at 37°C, 5% CO<sub>2</sub>. Cytokine production was measured in supernatants by enzyme-linked immunosorbent assay (ELISA) according to the manufacturer's instructions (R&D Systems).

### **Cytokine measurement**

Cytokine production in supernatants and plasmas was determined using commercial enzyme-linked immunosorbent assay kits for TNF $\alpha$ , IL-6, IL-1 $\beta$  (R&D Systems, MN, USA), IL-10 (Sanquin) according to the instructions of the manufacturers.

### **Annexin V/PI staining and lactate dehydrogenase (LDH) measurements for cell viability**

Apoptosis and cell viability of monocytes after 24h exposure to 100  $\mu\text{M}$  CPH or vehicle control was evaluated with Annexin V-FITC (Biovision) and Propidium Iodide ECD (Biovision) fluorescence with cytoFLEX flow cytometer (Beckman Coulter) and analyzed with Kaluza 2.1 (Beckman Coulter). Analysis of LDH as a measure of cytotoxicity in cells incubated with CPH for 24 hours was assessed in the supernatants by using a Cytotox 96 kit (Promega).

### **Quantitative RT-PCR**

Total RNA was isolated from human primary macrophages and total bone marrow of mice using TRIzol reagent according to the manufacturer's instructions. 0.5-1  $\mu\text{g}$  of total RNA was used to synthesize cDNA with the SuperScript III First-Strand Synthesis System (Thermo Fisher Scientific) according to the manufacturer's protocol. Quantitative RT-PCR was performed using an Applied Biosciences StepOne PLUS qRT-PCR machine using SYBR Green (Invitrogen). All reactions were performed for at least 6 biological replicates and the values expressed as fold increase in mRNA levels relative to those in non-trained cells. *18s* (human) or *H3f3a* (mouse) was used as a housekeeping gene. qRT-PCR primers are listed in Table S1.

### **Western blot analysis of primary human cells**

For protein expression analysis of primary human cells, approximately  $1 \times 10^6$  monocytes exposed for 24 hours to 100  $\mu\text{M}$  CPH and  $1 \times 10^6$  macrophages were lysed with 100  $\mu\text{L}$  of lysis buffer (1M Tris pH 7.4), 5M NaCl, 0.5M EDTA, 10% NP-40, 0.5M NaF, 2.5% sodium deoxycholate, PhosSTOP (Roche), cOmplete (Roche) prior to stimulation on day 6. The homogenate was frozen, then thawed and centrifuged at 4°C for 10 min at 15,000 x g, and the supernatant was taken for analysis. The western blot was performed using a Trans Turbo Blot System (Bio-Rad) according to the manufacturer's instructions. Protein was loaded and separated on SDS-PAGE using 4%-15% gradient precast gels and transferred to nitrocellulose membranes using the semi-dry method (Bio-Rad). Rabbit polyclonal primary antibodies were used for both Set7 (1:1000, 2813, Cell Signaling Technology) and Rpl29k5me2 (1:1000, 19495, Cell Signaling Technology). Swine-anti-rabbit polyclonal secondary HRP antibody (1:5000, P0217, Dako) was used to detect Set7 and Rpl29k5me2 protein expressions.  $\beta$ -actin was detected on the blots using rabbit polyclonal primary antibody (1:1000, A2066, Sigma-Aldrich) and swine-anti-rabbit polyclonal secondary HRP antibody (1:5000, P0217, Dako). HSP90 was detected on the blots using rabbit polyclonal primary antibody (1:1000, 4874, Cell Signaling Technology) and swine-anti-rabbit polyclonal secondary HRP antibody (1:5000, P0217, Dako). Blots were developed with ECL (GE Healthcare) according to the manufacturer's instructions.

### **Mouse experiments**

For the *in vivo* study of trained immunity, mice were injected intraperitoneally with 1 mg of  $\beta$ -glucan in 200  $\mu\text{L}$  of endotoxin-free phosphate-buffered saline (PBS). Intraperitoneal injections of PBS were performed as control. Five days after  $\beta$ -glucan administration, the mice were injected intraperitoneally with 10  $\mu\text{g}$  of LPS from *E. coli* 055:B5 (Sigma) as a secondary challenge. Mice were euthanized at 3 hours after the LPS challenge.

To isolate bone marrow cells (BMCs), mouse femurs and tibias were collected, trimmed and flushed with DPBS (GIBCO) using a 20 mL syringe with a 25 gauge needle to release BMCs. Bone marrow suspensions were gently harvested on 40  $\mu$ m nylon mesh strainer (Falcon) in 50 mL conical tubes. After centrifugation (5 min, 350  $\times$   $g$ , 4°C), the cells were suspended with RBC lysis buffer (155 mM  $\text{NH}_4\text{Cl}$ , 10 mM  $\text{KHCO}_3$ , 0.1 mM EDTA) to remove erythrocytes.

Protein analyses were performed as described previously (Okabe et al., 2012). Briefly, approximately  $5 \times 10^6$  BMCs were lysed with 250  $\mu$ L of buffer C (20 mM HEPES-KOH (pH 7.5), 25% Glycerol, 520 mM KCl, 5 mM  $\text{MgCl}_2$ , 0.1 mM EDTA, 1 mM DTT, 0.5 mM PMSF, 0.2% NP-40 and proteinase inhibitor cocktail) for 15 min at 4°C, then centrifuged for 15 min at 15,000  $\times$   $g$ , 4°C. The supernatant was collected for analysis. Primary antibodies were used for both Set7 (1:2,000, 2813, Cell Signaling Technology) and  $\beta$ -actin (1:10,000, 3700, Cell Signaling Technology). IRDye 800CW Donkey anti-mouse IgG and IRDye 680RD Donkey anti-rabbit IgG secondary antibodies (1:10,000 each, LI-COR) were used to detect Set7 and  $\beta$ -actin protein signals simultaneously.

### Metabolic analysis

Approximately  $1 \times 10^7$  monocytes were trained with  $\beta$ -glucan (1  $\mu$ g/mL) in 10 cm Petri dishes (Greiner) in 10 mL medium volumes for 24 hours, washed with warm PBS and incubated in normal culture medium at 37°C, 5%  $\text{CO}_2$ . Following 5 days in culture, cells were detached with versene solution (ThermoFisher Scientific) and  $1 \times 10^5$  cells were plated to overnight-calibrated cartridges in assay medium (RPMI with 0.6 mM glutamine, 5 mM glucose and 1 mM pyruvate [pH adjusted to 7.4]) and incubated for 1 hour in a non- $\text{CO}_2$ -corrected incubator at 37°C. Oxygen consumption rate (OCR) was measured using a Cell Mito Stress Kit (for OCR) or a glycolysis stress test kit in an XFp Analyzer (Seahorse Bioscience), with final concentrations of 1  $\mu$ M oligomycin, 1  $\mu$ M FCCP, and 0.5  $\mu$ M rotenone/antimycin A.

### Oxygen consumption measurement

Culture medium was collected from cells treated with either RPMI or  $\beta$ -glucan (1  $\mu$ g/mL or 10  $\mu$ g/mL). After stimulation, the cells were trypsinized, washed, and resuspended in the collected culture medium. Cell suspensions containing  $1 \times 10^6$  cells were then used for cellular  $\text{O}_2$  consumption analysis. Oxygen consumption was measured at 37°C using polarographic oxygen sensors in a two-chamber Oxygraph (OROBOROS Instruments, Innsbruck, Austria). DatLab software (Oroboros) was used for data acquisition (2 s time interval) and analysis (Gnaiger, 2001). First, basal respiration (baseline oxygen consumption) was measured. Next, leak respiration was determined by addition of 2.5  $\mu$ M of the specific complex V inhibitor oligomycin A (OLI). Then, maximal electron transport chain complex (ETC) capacity (maximum oxygen consumption) was quantified by applying increasing concentrations of the mitochondrial uncoupler FCCP (0.25 to 20  $\mu$ M final maximal concentration). Finally, minimal (non-mitochondrial) respiration was assessed by addition of the specific complex I inhibitor rotenone (ROT; 100 nM) and the complex III inhibitor antimycin A (AA; 2.5  $\mu$ M).

### Metabolite measurements

Cells were trained with  $\beta$ -glucan (1  $\mu$ g/mL) with and without CPH (100  $\mu$ M) as described above, using DMSO as a vehicle control. Metabolite concentrations measured from at least  $1 \times 10^6$  trained monocytes for succinate, fumarate, malate, oxaloacetate, and citrate were determined using a commercial colorimetric assay kit (Sigma) according to the manufacturer's instructions.

### Genetic analysis

We conducted *in vitro*  $\beta$ -glucan, BCG and oxLDL training of adherent PBMCs from 267 healthy individuals of Western European ancestry from the 300BCG cohort (NL58553.091.16). DNA samples of these individuals were genotyped using the commercially available SNP chip, Infinium Global Screening Array MD v1.0 from Illumina. Genotype information on approximately 4 million single-nucleotide polymorphisms (SNPs) was obtained upon imputation (MAF > 5% and  $R^2$  > 0.3 for imputation quality). First, raw cytokine levels were log-transformed and the ratio between trained and non-trained cytokine levels were taken as the change of cytokine levels. The cytokine changes were mapped to genotype data using a linear regression model with age and sex as covariates. Genetic outliers ( $n = 15$ ) and samples stimulated with low  $\beta$ -glucan (< 1  $\mu$ g/mL) were removed before QTL mapping.

We also conducted *in vitro*  $\beta$ -glucan training of adherent PBMCs in a second cohort of 119 healthy individuals of Western European ancestry from the 200 Functional Genomics cohort (2011/399) of the Human Functional Genomics Project ([www.humanfunctionalgenomics.org](http://www.humanfunctionalgenomics.org)). Genotype information on approximately 4 million single-nucleotide polymorphisms (SNPs) was obtained using Illumina HumanOmniExpressExome SNP chip upon imputation. Only SNPs with a minor allele frequency of  $\geq 5\%$  that passed standard quality filters were included in the analysis. Raw cytokine levels were log-transformed and the ratio between trained and non-trained cytokine levels was used to quantify the trained immunity response. They were subsequently mapped to genotype data using a linear regression model with age and sex as co-variables (Li et al., 2016).

### ChIP-seq and ChIA-PET analysis

This study makes use of H3K4me1 ChIP-seq datasets generated by the Blueprint Consortium (Adams et al., 2012). This study makes use of ChIA-PET data (accession number GSM970213). In the graphical display of the ChIA-PET data, the paired end tags (PETs) or chromosomal interactions are represented by two blocks for each end of the contact, connected by a horizontal line. The number of PETs in a cluster reflects the strength of the chromosomal interaction. The pre-processed datasets were visualized using the UCSC genome browser with the GRCh37/hg19 assembly (Kent et al., 2002). Enhancers were identified from the GeneHancer database of

human regulatory elements (Fishilevich et al., 2017). Enhancers with the highest annotation-derived confidence score were selected. The study makes use of Hi-C data from the K562 cell line (accession GSE63525). Hi-C maps were generated at 5kb resolution using the 3D genome browser with the GRCh37/hg19 assembly (Wang et al., 2018).

### Chromatin immunoprecipitation

Trained monocytes on day 6 were cross-linked in methanol free 1% formaldehyde, followed by sonication and immunoprecipitation using antibodies against H3K4me1 (Cell Signaling Technology). Immunoprecipitated chromatin was processed further for qRT-PCR analysis using the MiniElute DNA purification kit (QIAGEN). Primers used in the reaction are listed in Table S1. Samples were analyzed with a comparative Ct method on the StepOne PLUS qPCR machine (Applied Biosystems) using SYBR green (Invitrogen) in accordance with the manufacturer's instructions.

### QUANTIFICATION AND STATISTICAL ANALYSIS

Statistical parameters including the exact value of n, the definition of center, dispersion and precision measures (mean  $\pm$  SEM), and statistical significance are reported in the figures and figure legends. Statistical analysis was performed using GraphPad Prism 8.12 (GraphPad Inc.). Analysis of human qPCR, ELISA and cellular assays was performed using Wilcoxon signed-rank test, t test or non-parametric Mann-Whitney tests, as appropriate. Analysis of mouse data used Mann-Whitney tests for comparisons between groups. R-package Matrix-eQTL was used for cytokine QTL mapping. A p value  $< 0.05$  (\*) was considered statistically significant, (\*\*)  $p < 0.01$ . Data are shown as mean  $\pm$  SEM.

**Supplemental Information**

**The Set7 Lysine Methyltransferase Regulates  
Plasticity in Oxidative Phosphorylation Necessary  
for Trained Immunity Induced by  $\beta$ -Glucan**

**Samuel T. Keating, Laszlo Groh, Charlotte D.C.C. van der Heijden, Hanah Rodriguez, Jéssica C. dos Santos, Stephanie Fanucchi, Jun Okabe, Harikrishnan Kaipananickal, Jelmer H. van Puffelen, Leonie Helder, Marlies P. Noz, Vasiliki Matzaraki, Yang Li, L. Charlotte J. de Bree, Valerie A.C.M. Koeken, Simone J.C.F.M. Moorlag, Vera P. Mourits, Jorge Domínguez-Andrés, Marije Oosting, Elianne P. Bulthuis, Werner J.H. Koopman, Musa Mhlanga, Assam El-Osta, Leo A.B. Joosten, Mihai G. Netea, and Niels P. Riksen**

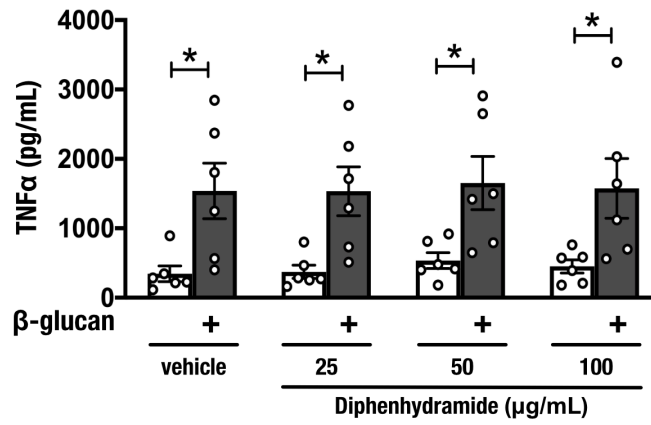

**Figure S1. Diphenhydramide does not inhibit trained immunity induced by  $\beta$ -glucan, Related to Figure 2.**

Production of TNF $\alpha$  by  $\beta$ -glucan-trained macrophages incubated with diphenhydramide for the first 24 hours of *in vitro* training and restimulated with LPS (n=6 healthy volunteers).

Data are represented as mean  $\pm$  SEM, \*p < 0.05; Wilcoxon signed-rank test.



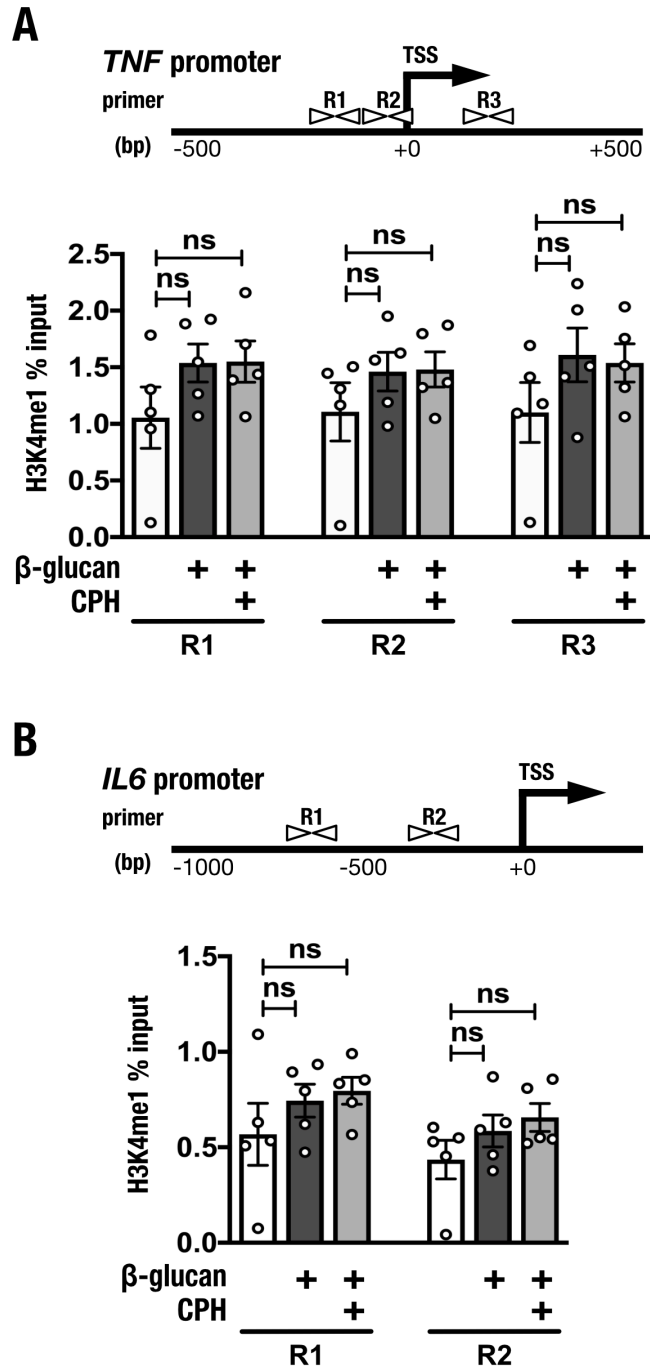

**Figure S2.  $\beta$ -glucan and CPH do not influence H3K4me1 enrichment at the promoters of *TNF* and *IL6*, Related to Figure 2 and Table S1.** H3K4me1 enrichment at the gene promoters of (A) *TNF* and (B) *IL6* (n=5 healthy volunteers). The positions of primers relative to the transcription start site (TSS) are indicated.

Data are represented as mean  $\pm$  SEM, Wilcoxon signed-rank test.

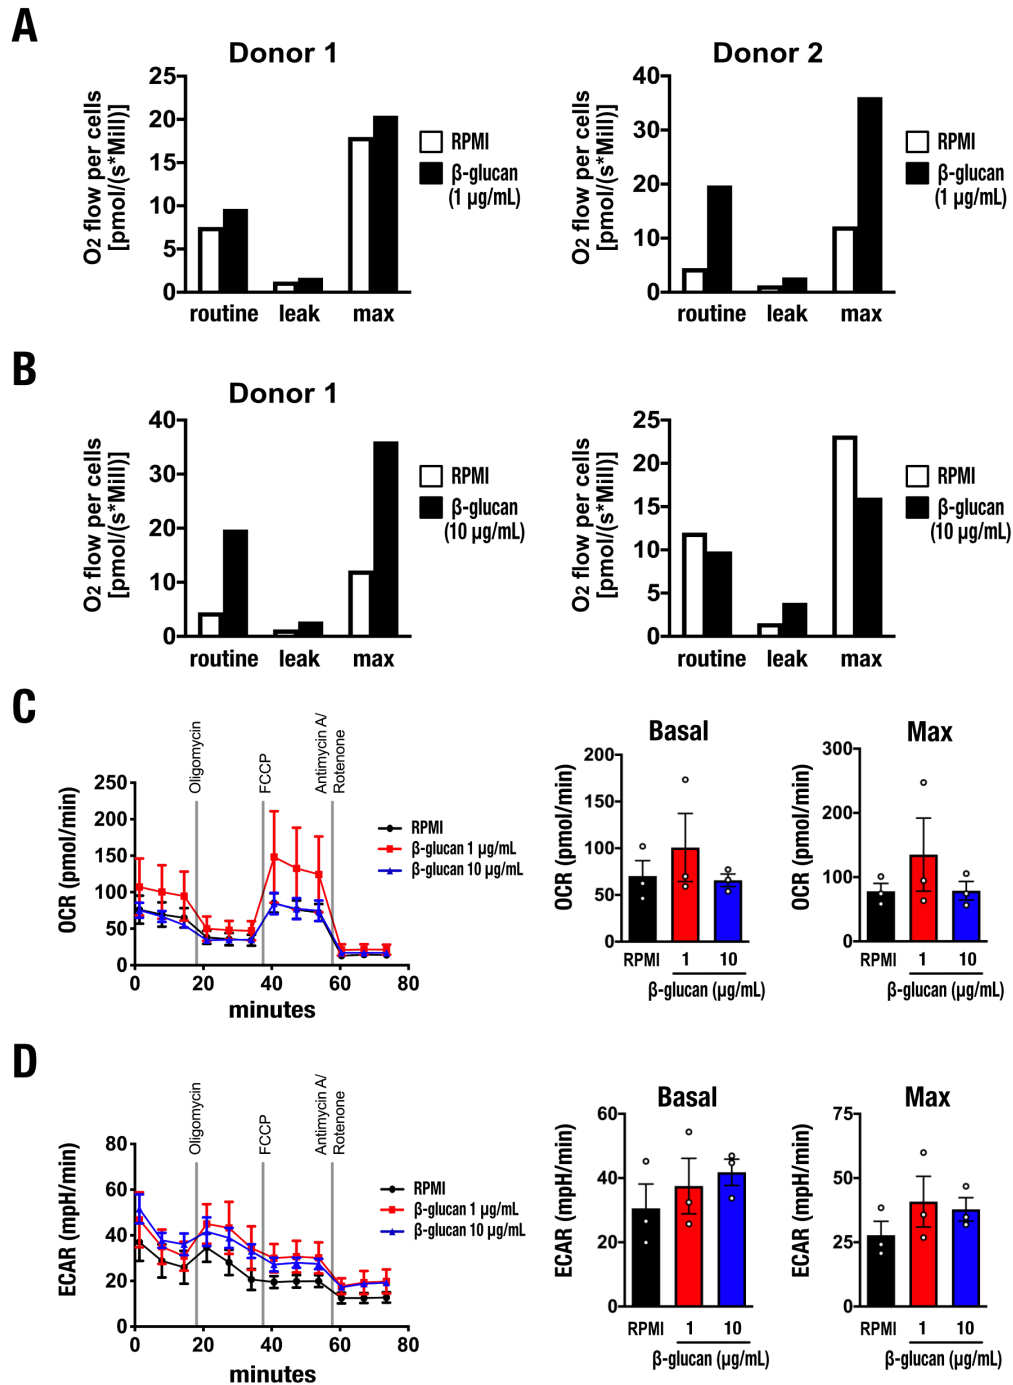

**Figure S3. Metabolic analysis of cells trained with different concentrations of  $\beta$ -glucan, Related to Figure 4.**

**A)** Respirometry measurements of macrophages from 2 health volunteers 5 days after incubation with 1  $\mu\text{g/mL}$  of  $\beta$ -glucan using the Oxygraph-2k. **(B)** Respirometry measurements of macrophages from 2 health volunteers 5 days after incubation with 10  $\mu\text{g/mL}$  of  $\beta$ -glucan using the Oxygraph-2k. **(C)** Oxygen consumption analysis (Seahorse system) of macrophages 5 days after incubation with 1  $\mu\text{g/mL}$  of  $\beta$ -glucan or 10  $\mu\text{g/mL}$  of  $\beta$ -glucan. Basal and maximum oxygen consumption rates (OCR) are indicated ( $n = 3$  healthy volunteers). **(D)** Extracellular acidification rate (ECAR) analysis (Seahorse system) of macrophages 5 days after incubation with 1  $\mu\text{g/mL}$  of  $\beta$ -glucan or 10  $\mu\text{g/mL}$  of  $\beta$ -glucan. Basal and maximum ECAR are indicated ( $n = 3$  healthy volunteers).

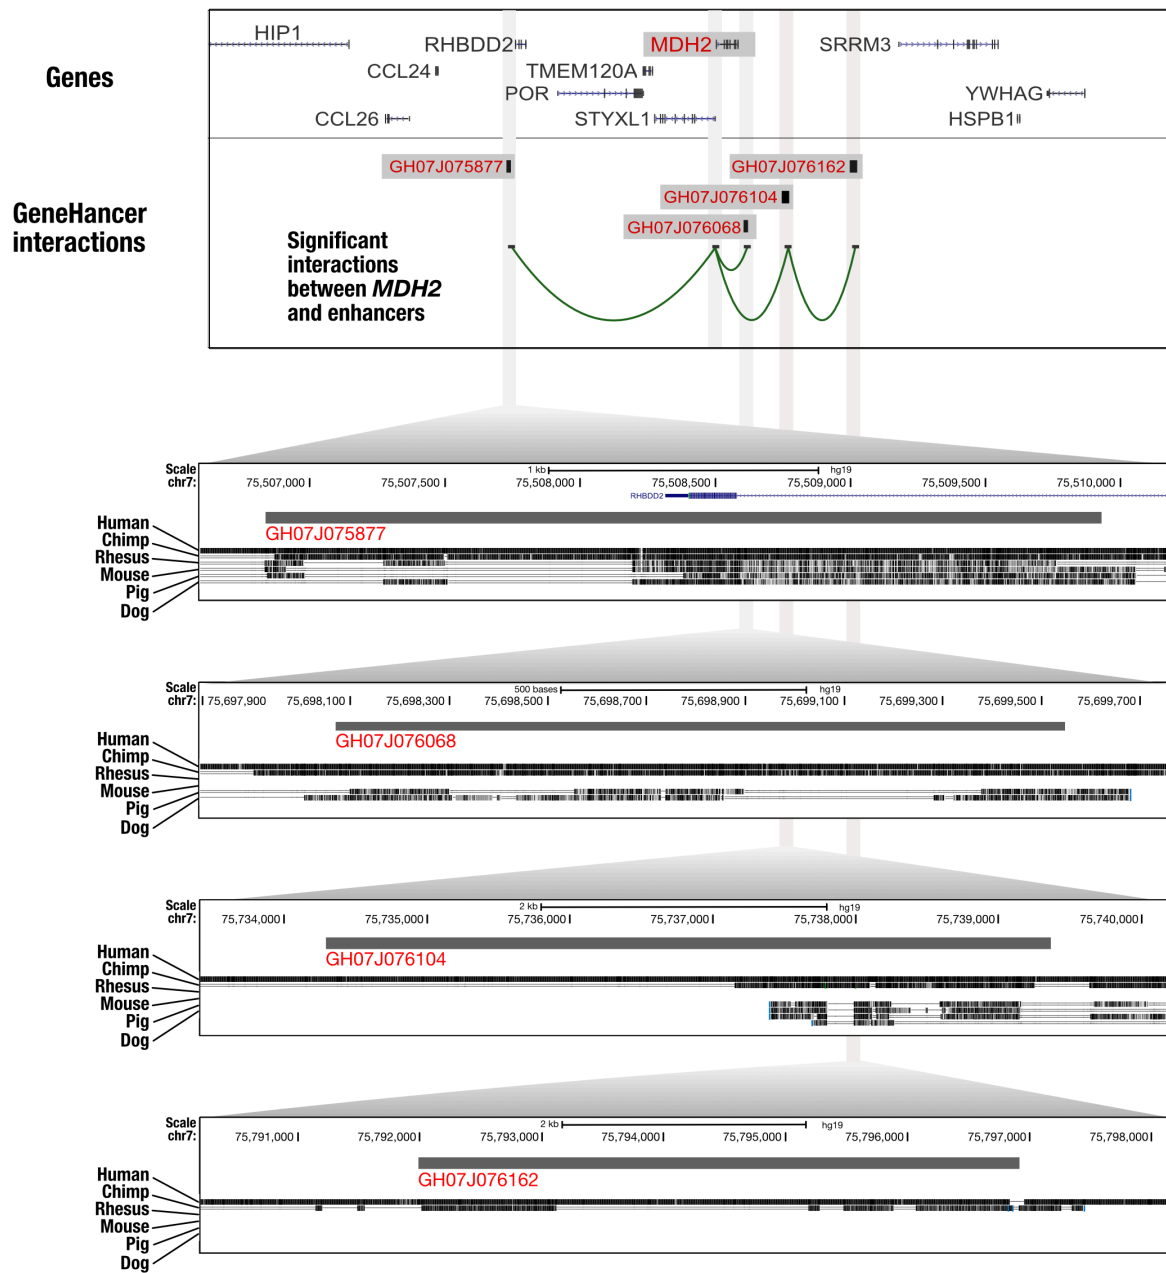

**Figure S4. Evolutionary conservation of distal enhancers associated with MDH2 gene regulation in humans, Related to Figure 6.** Alignment of genomic sequences from human, chimp, rhesus, mouse, pig and dog at GH07J075877, GH07J076068, GH07J076104 and GH07J076162

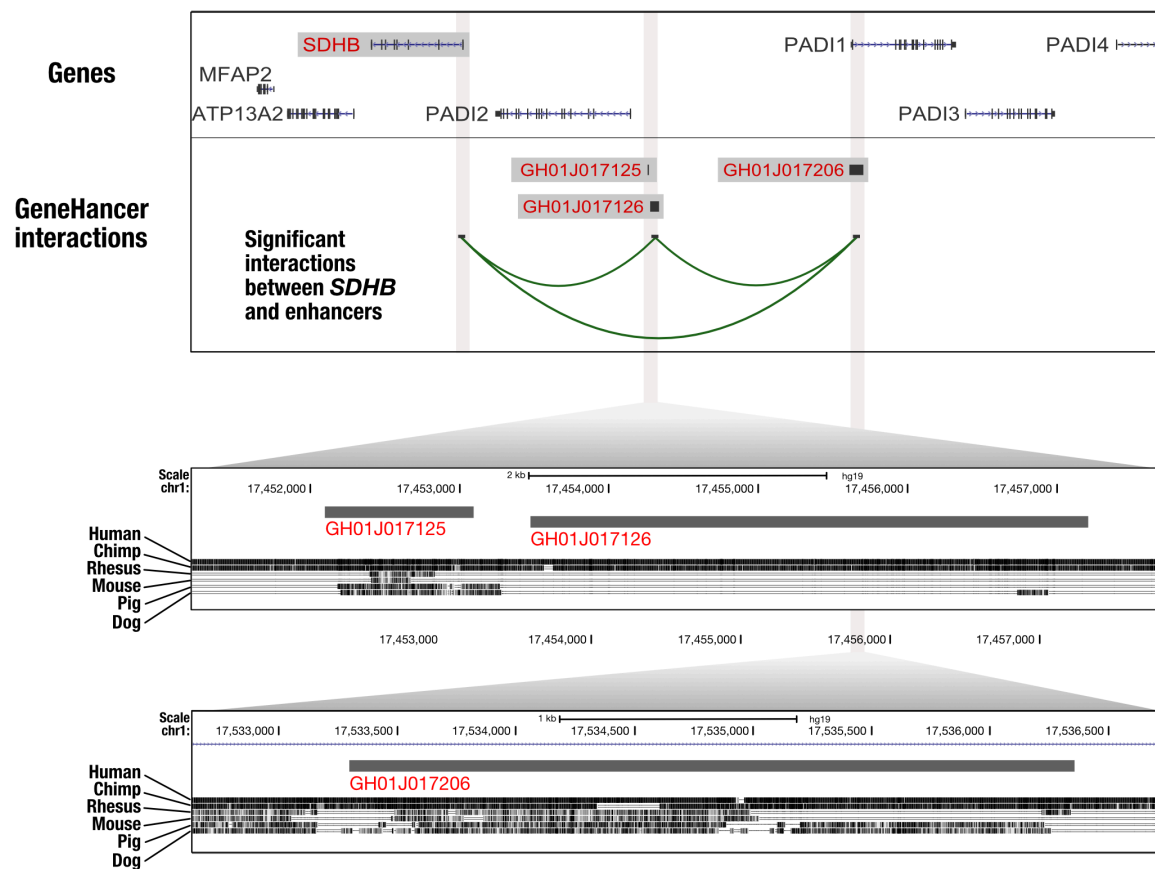

**Figure S5. Evolutionary conservation of distal enhancers associated with *SDHB* gene regulation in humans, Related to Figure 6.** Alignment of genomic sequences from human, chimp, rhesus, mouse, pig and dog at GH01J017125, GH01J017126 and GH01J017206.

**A**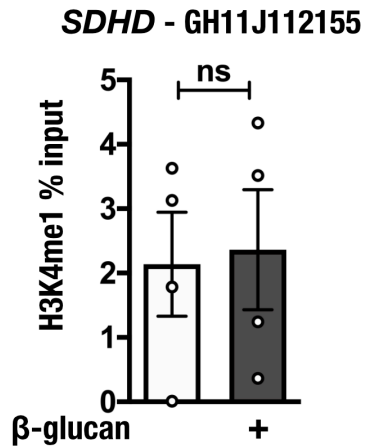**B**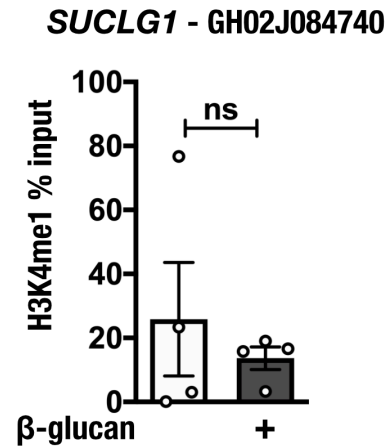

**Figure S6.  $\beta$ -glucan did not induce significant changes to H3K4me1 at distal enhancers associated with *SDHD* and *SUCLG1* gene regulation, Related to Figure 6 and Table S1.** (A) Levels of H3K4me1 at the GH11J112155 enhancer, associated with transcriptional regulation of *SDHD*, measured in primary human macrophages 5 days after incubation with  $\beta$ -glucan (n = 4 healthy volunteers). (B) Levels of H3K4me1 at the GH02J084740 enhancer, associated with transcriptional regulation of *SUCLG1*, measured in primary human macrophages 5 days after incubation with  $\beta$ -glucan (n = 4 healthy volunteers).

Data are represented as mean  $\pm$  SEM, Wilcoxon signed-rank test.

**Table S1. Primers used for qRT-PCR analysis of mRNA expression and immunoprecipitated chromatin.** Related to STAR Methods, *Quantitative RT-PCR* and *Chromatin immunoprecipitation*.

| <b>qRT-PCR primers for gene expression analysis</b>                 |                        |                           |
|---------------------------------------------------------------------|------------------------|---------------------------|
| <b>Human</b>                                                        |                        |                           |
| <b>Gene</b>                                                         | <b>Forward (5'→3')</b> | <b>Reverse (5'→3')</b>    |
| <i>SETD7</i>                                                        | AGTGTAAGTCCCTGGCCCT    | G TTCACGGAGAAAAGAACGG     |
| <i>RPL29</i>                                                        | CACACAACCAGTCCCGAAAA   | TTGTGCTTCTTGGCAAAGCG      |
| <i>SUCLG1</i>                                                       | TATGGCACCAAACCTCGTTGGA | GAAGCCGTTGCTCCTGTCT       |
| <i>FH</i>                                                           | GGAGGTGTGACAGAACGCAT   | CATCTGCTGCCTTCATTATTGC    |
| <i>MDH2</i>                                                         | TCGGCCCAGAACAATGCTAAA  | GCGGCTTTGGTCTCGATGT       |
| <i>CS</i>                                                           | GGTGGCATGAGAGGCATGAA   | TAGCCTTGGGTAGCAGTTTCT     |
| <i>SDHA</i>                                                         | CAGCATGTGTTACCAAGCT    | GGTGTCTAGAAATGCCAC        |
| <i>SDHB</i>                                                         | ACAGCTCCCCGTATCAAGAAA  | GCATGATCTTCGGAAGGTCAA     |
| <i>SDHC</i>                                                         | AGAACTGGACGGGCTCTAC    | TGTGGCAGCGGTATAGAGAG      |
| <i>SDHD</i>                                                         | CATCTCTCCACTGGACTAGCG  | TCCATCGCAGAGCAAGGATTC     |
| <i>18s</i>                                                          | GATGGGCGGCGGAAAATAG    | GCGTGGATTCTGCATAATGGT     |
| <b>Mouse</b>                                                        |                        |                           |
| <b>Gene</b>                                                         | <b>Forward (5'→3')</b> | <b>Reverse (5'→3')</b>    |
| <i>Setd7</i>                                                        | CGCTCAGCCACCAGGAGCAC   | G TCCAGGTGCCCTTCCACGG     |
| <i>Csf2</i>                                                         | ATGCCTGTCACGTTGAATGA   | TGGTGAAATTGCCCCGTAGA      |
| <i>Ii1b</i>                                                         | ACGGACCCCAAAGATGAAGGG  | ACTGCCTGCCTGAAGCTCTTGT    |
| <i>Cd34</i>                                                         | ACATCACCCACCGAGCCATA   | AAACTCCTCACAAC TAGATGCTTC |
| <i>Mdh2</i>                                                         | TACCTTGGACCGGAGCAGTT   | TCATCCC GTGTCATTCTCTGG    |
| <i>Sdhb</i>                                                         | AGAGAAGGCATCTGTGGCTC   | AGACTTTGCTGAGGTCCGTG      |
| <i>Fh1</i>                                                          | AAGCCAGAGCTCGAATGACA   | TGTAACCCTGGCAACAGGAC      |
| <i>Suclg2</i>                                                       | GGTCTTACACAGCCTCTCGG   | AGGTACCCTGTTTGCCTGTG      |
| <i>H3f3a</i>                                                        | GAGCTCCAGCCGAAGGAGAAG  | CAGTACCAGGCCTGTAACGATGAG  |
| <b>qRT-PCR primers for analysis of immunoprecipitated chromatin</b> |                        |                           |
| <b>Region</b>                                                       | <b>Forward (5'→3')</b> | <b>Reverse (5'→3')</b>    |
| <i>TNF</i> promoter R1                                              | CAGGCAGGTTCTCTTCCTCT   | GCTTTCAGTGCTCATGGTGT      |
| <i>TNF</i> promoter R2                                              | AGAGGACCAGCTAAGAGGGA   | AGCTTGTCAGGGGATGTGG       |
| <i>TNF</i> promoter R3                                              | GTGCTTGTTCTCAGCCTCT    | ATCACTCCAAAGTGCAGCAG      |

|                        |                        |                         |
|------------------------|------------------------|-------------------------|
| <i>IL6</i> promoter R1 | TCGTGCATGACTTCAGCTTT   | GCGCTAAGAAGCAGAACCAC    |
| <i>IL6</i> promoter R2 | AGGGAGAGCCAGAACACAGA   | GAGTTTCCTCTGACTCCATCG   |
| GH07J075877 R1         | AAGATAAAGCTGCCCTGGC    | GAGGGCCCTGGGTAATTCAG    |
| GH07J075877 R2         | TCTTGCTCTCCGTGTTCCAC   | CTTGGAGAGCGAGCATGGAT    |
| GH07J075877 R3         | GGCCTAAGCCCCACTGAAAA   | TCCAAAGGCAGAAGACACCC    |
| GH07J075877 R4         | ATGAAGCCTCTGGTGATGGC   | GAACCCAGAAAGTGGGAGG     |
| GH07J076068 R1         | AGGACCTGGGACTCAAGCTA   | GGGTAGCCCCTGGTTTATGG    |
| GH07J076104 R1         | CAGGGGTGCGCATTTCAG     | TCTGTCCAGAACCCAGTGA     |
| GH07J076104 R2         | GCTCACTGGGGTTCTGGACA   | AGTGCCTCCAGAAAGGGTTG    |
| GH07J076162 R1         | ACCAAGTTGGAACCCCTAGC   | GGGATAGGCCCGTCCTGTAT    |
| GH07J076162 R2         | CGCCCCTTCTGTAGAACCAA   | GCAGTGGTAAAGCTCGTCCT    |
| GH01J017206 R1         | AGACGAGGACAGCTCAGACT   | GAGGGCCCTGGGTAATTCAG    |
| GH01J017206 R2         | GAGGTTGCTCTGGGATCCTG   | CCAACACCCAGGTGAAGGTT    |
| GH01J017206 R3         | GGGAAAGAGGGGCATGGAAT   | GTGTAACCCCTTCCTCCTGC    |
| GH01J017206 R4         | CCTGATTCCCTGGATCTGGC   | CACAGGACCGCAGATGGATT    |
| GH01J017206 R5         | AATCCATCTGCGGTCCTGTG   | TGCATTGCTGCTTTTGCAGT    |
| GH01J017126 R1         | GGTTCCATTGACAATCTTGGCT | TCAAGGCTGAAGTGTGTCGG    |
| GH01J017126 R2         | AGACTCTGACGCTCCTGGTTA  | GTGCTTGAGAAAGTTGTGTTTGT |
| GH01J017125 R1         | CCATCTTGGAAGCAGGGAGG   | GCCCCTGAATTCTGACCCAA    |
| GH01J017125 R2         | TTGGGTCAGAATTCAGGGGC   | CCCTTTGTCCAGCGAGAAGT    |
| GH01J017125 R3         | GGGAACTTCTCGCTGGACAA   | GAATCAACGACCCAGGCTCA    |
| GH01J017125 R4         | ATCCTAGCCCTTCCTGGCTT   | GGTGCCATGATTAACCCCA     |
| GH11J112174 R1         | TCCGCATTAAAGCACCCGAT   | CCCCGGGTGTGTCAATAAGT    |
| GH02J084740 R1         | TGACCCATGCAGACCAGTTC   | GACTGGAGTGGGAGGAGAGT    |
